# Supplementary material for: Efficient phosphine ligands for the one-pot palladium-catalyzed borylation/Suzuki–Miyaura cross-coupling reaction
Source: Royal Society of Chemistry journal article supplement (doi:10.1039/c4ob02436b), 2015-01-01
Supplement: c4ob02436b1.pdf [file c4ob02436b1.pdf]

## Supporting Information

### Efficient Phosphine ligands for the One-Pot Palladium-Catalyzed Borylation/Suzuki–Miyaura Cross-coupling Reaction

You Chen,<sup>a</sup> Hui Peng,<sup>b</sup> Yun-Xiao Pi,<sup>c</sup> Tong Meng,<sup>a</sup> Ze-Yu Lian,<sup>a</sup> Meng-Qi Yan,<sup>a</sup> Yan  
Liu,<sup>a</sup> Sheng-Hua Liu,<sup>a</sup> Guang-Ao Yu<sup>\*,a</sup>

<sup>a</sup> *Key Laboratory of Pesticide & Chemical Biology, Ministry of Education, College of Chemistry, Central China Normal University, Wuhan 430079, People's Republic of China.*

<sup>b</sup> *Department of Chemistry, State Key Laboratory of Elemento-Organic Chemistry, Nankai University, Tianjin 300071, People's Republic of China.*

<sup>c</sup> *State Key Laboratory of Catalysis, Dalian Institute of Chemical Physics, Chinese Academy of Sciences, 457 Zhongshan Road, Dalian 116023, People's Republic of China*

\* *Corresponding authors: E-mail address, yuguang@mail.ccnu.edu.cn.*

## CONTENT

|                                                                                                             |     |
|-------------------------------------------------------------------------------------------------------------|-----|
| 1. Experimental Section.....                                                                                | S2  |
| 2. Figure S1. Molecular structure of <b>1</b> .....                                                         | S5  |
| 3. Table S1. Crystal Data and Summary of X-ray Data Collection of <b>1</b> .....                            | S6  |
| 4. <sup>1</sup> H NMR, <sup>31</sup> P NMR, <sup>13</sup> C NMR spectra and HRMS of compound <b>1</b> ..... | S7  |
| 5. <sup>1</sup> H NMR spectra of coupling products.....                                                     | S11 |
| 6. References.....                                                                                          | S43 |

## Experimental Section

### General information

Unless otherwise noted, all reagents were purchased from commercial suppliers and used without purification. 9-(1H-inden-2-yl) anthracene **4** was prepared according to the reported procedure.<sup>1</sup> All reactions were performed in a resealable screw cap Schlenk flask (approx. 10 mL volume) in the presence of a Teflon coated magnetic stirrer bar (3 mm × 50 mm). Dimethyl acetamide was distilled from anhydrous magnesium sulfate under nitrogen. Silica gel (70–230 and 230–400 mesh) was used for column chromatography. <sup>1</sup>H NMR and <sup>13</sup>C NMR spectra were recorded on a MercuryPlus (400 MHz) spectrometer. HRMS were obtained on an IonSpec FT-ICR mass spectrometer with ESI resource. Compounds described in the literature were characterized by comparison of their <sup>1</sup>H NMR spectra to the previously reported data.

### Preparation of 2-(anthracen-9-yl)-1H-inden-3-yl dicyclohexylphosphine **1**

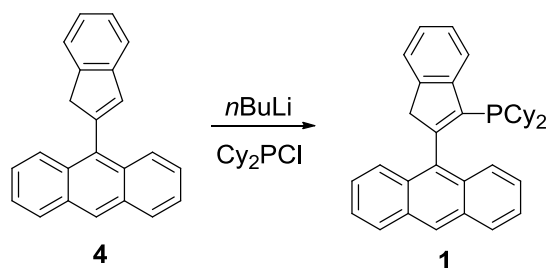

In a 100ml flask 9-(1H-inden-2-yl) anthracene **4** (1.46 g, 5.0 mmol) was dissolved in THF (50 mL) under nitrogen atmosphere. The mixture was cooled to  $-78^{\circ}\text{C}$ , and *n*BuLi (3.75 mL, 1.6 M solution in hexane, 6.0 mmol) was added. The solution was stirred for 30 min at  $-78^{\circ}\text{C}$  and then for 6 h at ambient temperature. Then the mixture was cooled to  $-78^{\circ}\text{C}$  and Cy<sub>2</sub>PCl (1.1 mL, 5.0 mmol) was added. The mixture was warmed to room temperature and stirred for additional 16 h. The reaction was quenched with water (20 mL). The organic layer was separated from the aqueous layer. The aqueous layer was extracted with CH<sub>2</sub>Cl<sub>2</sub> (25 mL×2). The combined organic phase was dried over anhydrous MgSO<sub>4</sub>, concentrated, and purified by column chromatography (eluent: CH<sub>2</sub>Cl<sub>2</sub>) to provide the desired product as a yellow solid (1.66 g, 68%). <sup>1</sup>H NMR (400 MHz, CDCl<sub>3</sub>): δ 8.46 (s, 1H), 8.02 (d, *J* = 8.5 Hz, 2H), 7.82 (d, *J* = 7.7 Hz, 1H), 7.78 (d, *J* = 8.8 Hz, 2H), 7.56 (d, *J* = 7.3 Hz, 1H), 7.43 (dd, *J* = 13.9 Hz, 5.6 Hz, 3H), 7.37 – 7.28 (m, 3H), 3.91 (s, 2H), 2.30 (br, 2H), 1.77 (br, 2H), 1.60–1.63 (m, 8H), 1.02–1.21 (m, 10H) ppm. <sup>13</sup>C NMR (101 MHz, CDCl<sub>3</sub>): δ 159.21, 158.88, 147.08, 143.73, 140.53, 140.27, 133.55, 131.31, 129.94, 128.70, 127.03, 126.64, 125.08, 124.95, 124.83, 123.95, 122.46, 46.13, 34.57, 34.47, 32.60, 32.39, 31.20, 31.12, 27.50, 27.43, 27.27, 27.14, 26.32 ppm. <sup>31</sup>P NMR (162 MHz, CDCl<sub>3</sub>): δ -16.21 ppm. HRMS (ESI/ [M+H]<sup>+</sup>) Calcd. for: C<sub>35</sub>H<sub>37</sub>P 488.2711, found 488.2712.

## Crystallographic Studies

Single crystal of **1** for X-ray diffraction analysis was obtained by slow diffusion of hexane into its CH<sub>2</sub>Cl<sub>2</sub> solutions at room temperature. Crystallographic data was collected on a Bruker SMART CCD area-detector diffractometer with graphite-monochromated Mo K $\alpha$  radiation ( $\lambda$  = 0.71073 Å). Diffraction measurements were made at room temperature. An absorption correction by SADABS was applied to the intensity data. The structures were solved by Patterson method. The remaining non-hydrogen atoms were determined from the successive difference Fourier syntheses. All non-hydrogen atoms were refined anisotropically except those mentioned otherwise. The hydrogen atoms were generated geometrically and refined with isotropic thermal parameters. The structures were refined on  $F^2$  by full-matrix least-squares methods using the SHELXTL-97 program package.

## General procedures for reaction condition screenings

A Pd source (0.02 mmol), a phosphine ligand (0.04 mmol), base (3.0 mmol) and bis(pinacolato)diboron (254 mg, 1.0 mmol) was loaded into a Schlenk tube equipped with a Teflon-coated magnetic stir bar. 4-Chlorotoluene (0.29 mL, 2.4 mmol) and dimethyl acetamide (2.0 mL) were added. The tube was evacuated and flushed with nitrogen three times, and then placed in a preheated oil bath with the temperature indicated in the table and stirred for 20 h. After completion of the reaction, the reaction tube was allowed to cool to room temperature. Water (10 mL) and EtOAc (10 mL) were added. The aqueous layer was extracted with EtOAc (3  $\times$  10 mL), dried over anhydrous sodium sulfate, and concentrated. The crude product was purified by column chromatography on silica gel to afford the desired product.

## General Procedure for the Preparation of Symmetrical Biaryls

Pd(dba)<sub>2</sub> (12 mg, 0.02 mmol), ligand **1** (20 mg, 0.04 mmol), K<sub>3</sub>PO<sub>4</sub>·3H<sub>2</sub>O (0.8 g, 3.0 mmol) and bis(pinacolato)diboron (254 mg, 1.0 mmol) was loaded into a Schlenk tube equipped with a Teflon-coated magnetic stir bar. Aryl chlorides or heteroaryl chloride (2.4 mmol) and dimethyl acetamide (2.0 mL) were added. The tube was evacuated and flushed with nitrogen three times, and then placed in a preheated oil bath (100 °C) and stirred for 20 h. After completion of the reaction, the reaction tube was allowed to cool to room temperature. Water (10 mL) and EtOAc (10 mL) were added. The aqueous layer was extracted with EtOAc (3  $\times$  10 mL), dried over anhydrous sodium sulfate, and concentrated. The crude product was purified by column chromatography on silica gel to afford the desired product.

## General Procedure for the Preparation of Unsymmetrical Biaryls

Pd(dba)<sub>2</sub> (12 mg, 0.02 mmol), ligand (20 mg, 0.04 mmol), KOAc (0.3 g, 3.0 mmol) and bis(pinacolato)diboron (305 mg, 1.2 mmol) was loaded into a Schlenk tube equipped

with a Teflon-coated magnetic stir bar. The first aryl halide (1.2 mmol) and dimethyl acetamide (2.0 mL) were added. The tube was evacuated and flushed with nitrogen three times, and then placed in a preheated oil bath (100 °C) and stirred for 3 h. After completion of the reaction, the reaction tube was allowed to cool to room temperature. The second aryl or heteroaryl chlorides and  $\text{K}_3\text{PO}_4 \cdot 3\text{H}_2\text{O}$  were loaded into the tube under nitrogen. Dimethyl acetamide (0.5 mL) was added. The tube was then placed into a preheated oil bath (100 °C) and stirred for 16 h. After completion of the reaction, the reaction tube was allowed to cool to room temperature. Water (10 mL) and EtOAc (10 mL) were added. The aqueous layer was extracted with EtOAc ( $3 \times 10$  mL), dried over anhydrous sodium sulfate, and concentrated. The crude product was purified by column chromatography on silica gel to afford the desired product.



Table S1. Crystal Data and Summary of X-ray Data Collection of **1**

|                                                                              | <b>1</b>                                       |
|------------------------------------------------------------------------------|------------------------------------------------|
| formula                                                                      | C <sub>70</sub> H <sub>74</sub> P <sub>2</sub> |
| fw                                                                           | 977.23                                         |
| <i>T</i> , K                                                                 | 100(2)                                         |
| Wavelength, Å                                                                | 0.71073                                        |
| crystal system                                                               | Monoclinic                                     |
| space group                                                                  | C2/c                                           |
| <i>a</i> , Å                                                                 | 23.590(3)                                      |
| <i>b</i> , Å                                                                 | 12.9016(15)                                    |
| <i>c</i> , Å                                                                 | 18.644(2)                                      |
| $\alpha$ , deg                                                               | 90                                             |
| $\beta$ , deg                                                                | 98.267(2)                                      |
| $\gamma$ , deg                                                               | 90                                             |
| <i>V</i> , Å <sup>3</sup>                                                    | 5615.3(11)                                     |
| <i>Z</i>                                                                     | 4                                              |
| <i>D</i> <sub>cal</sub> , g/cm <sup>-3</sup>                                 | 1.156                                          |
| Absorption coefficient, mm <sup>-1</sup>                                     | 0.119                                          |
| F(000)                                                                       | 2096                                           |
| cryst size, mm                                                               | 0.20×0.20×0.10                                 |
| $\theta$ range, deg                                                          | 1.74-30.00                                     |
| no. of reflns collected                                                      | 26267                                          |
| no. of indep reflns/ <i>R</i> <sub>int</sub>                                 | 8157/0.0288                                    |
| no. of params                                                                | 326                                            |
| GOF on <i>F</i> <sup>2</sup>                                                 | 1.042                                          |
| <i>R</i> <sub>1</sub> , w <i>R</i> <sub>2</sub> [ <i>I</i> > 2σ( <i>I</i> )] | 0.0470, 0.1279                                 |
| <i>R</i> <sub>1</sub> , w <i>R</i> <sub>2</sub> (all data)                   | 0.0681, 0.1494                                 |
| largest diff peak and hole (e Å <sup>-3</sup> )                              | 0.286, -0.220                                  |

**$^1\text{H}$  NMR,  $^{31}\text{P}$  NMR,  $^{13}\text{C}$  NMR and HRMS spectra of compound 4 and 1**

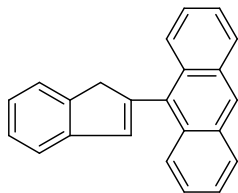

**9-(1H-inden-2-yl) anthracene (4)**

Green solid.  $^1\text{H}$  NMR (400 MHz,  $\text{CDCl}_3$ ):  $\delta$  8.45 (s, 1H), 8.03 (d,  $J = 8.4$  Hz, 2H), 7.95 (d,  $J = 8.7$  Hz, 2H), 7.60 – 7.50 (m, 2H), 7.49 – 7.32 (m, 5H), 7.32 – 7.27 (m, 1H), 7.04 (s, 1H), 3.89 (s, 2H) ppm. Data is consistent with that reported in the literature.<sup>1</sup>

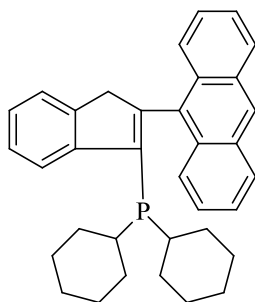

**2-(anthracen-9-yl)-1H-inden-3-yl dicyclohexylphosphine (1)**

Yellow solid.  $^1\text{H}$  NMR (400 MHz,  $\text{CDCl}_3$ ):  $\delta$  8.46 (s, 1H), 8.02 (d,  $J = 8.5$  Hz, 2H), 7.82 (d,  $J = 7.7$  Hz, 1H), 7.78 (d,  $J = 8.8$  Hz, 2H), 7.56 (d,  $J = 7.3$  Hz, 1H), 7.43 (dd,  $J = 13.9$  Hz, 5.6 Hz, 3H), 7.37 – 7.28 (m, 3H), 3.91 (s, 2H), 2.30 (br, 2H), 1.77 (br, 2H), 1.60–1.63 (m, 8H), 1.02–1.21 (m, 10H) ppm.  $^{13}\text{C}$  NMR (101 MHz,  $\text{CDCl}_3$ ):  $\delta$  159.21, 158.88, 147.08, 143.73, 140.53, 140.27, 133.55, 131.31, 129.94, 128.70, 127.03, 126.64, 125.08, 124.95, 124.83, 123.95, 122.46, 46.13, 34.57, 34.47, 32.60, 32.39, 31.20, 31.12, 27.50, 27.43, 27.27, 27.14, 26.32 ppm.  $^{31}\text{P}$  NMR (162 MHz,  $\text{CDCl}_3$ ):  $\delta$  -16.21 ppm. HRMS (ESI/  $[\text{M}+\text{H}]^+$ ) Calcd. for:  $\text{C}_{35}\text{H}_{37}\text{P}$  488.2711, found 488.2712.

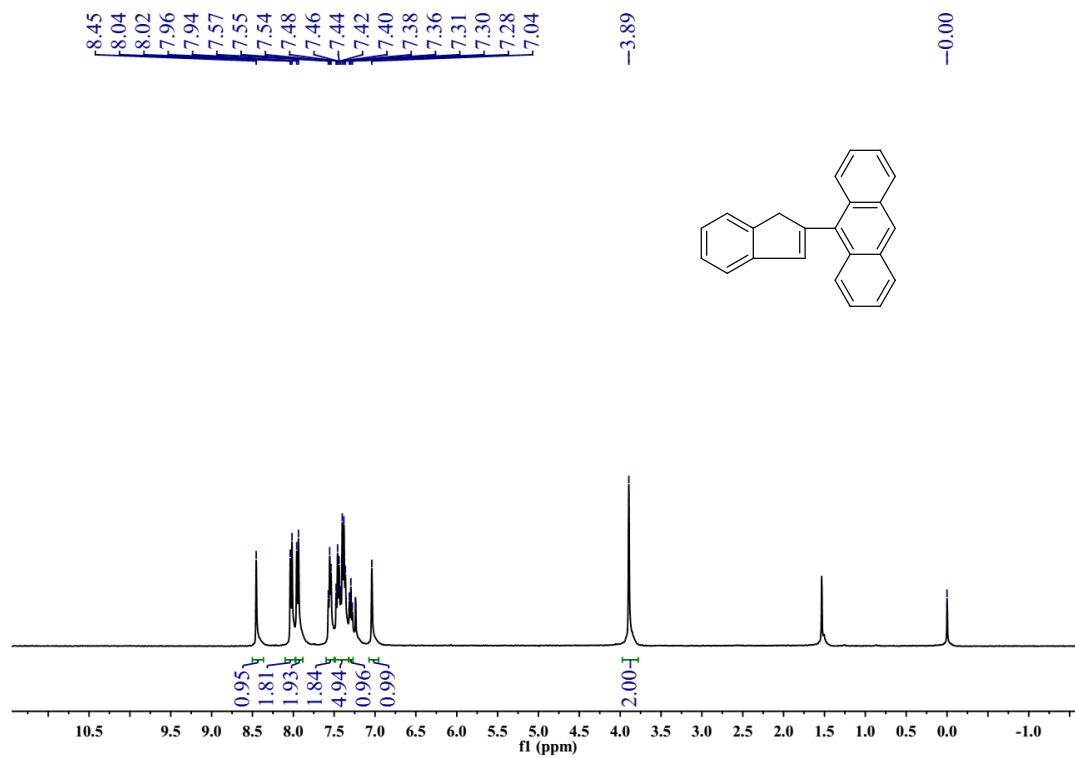

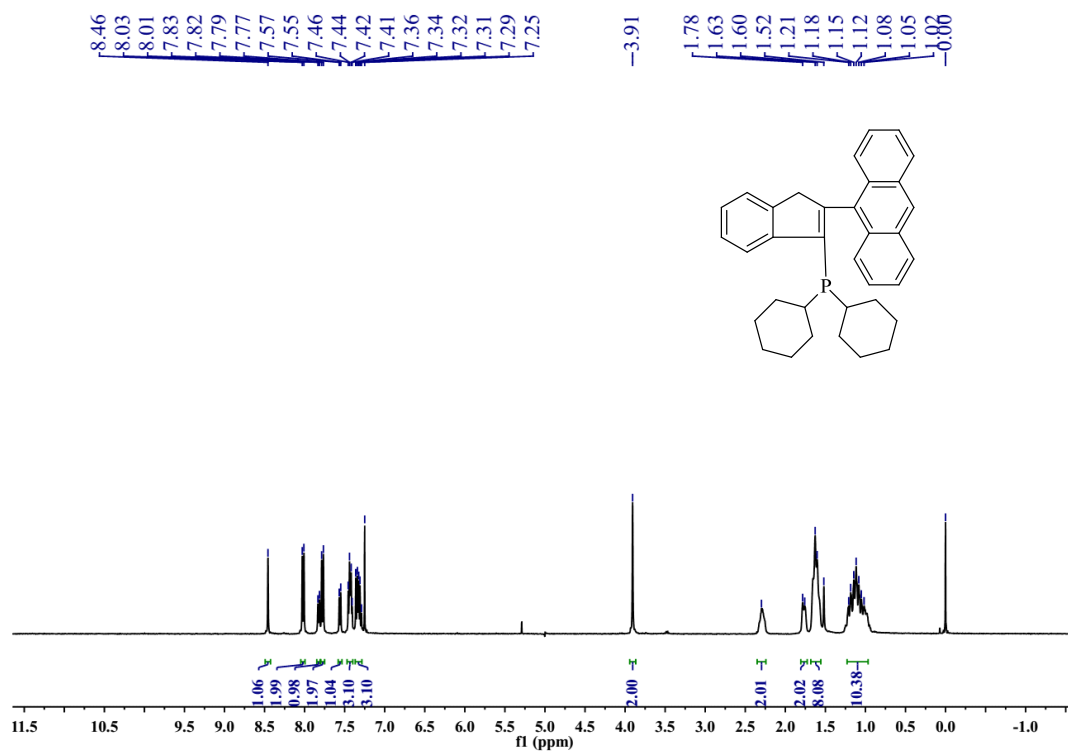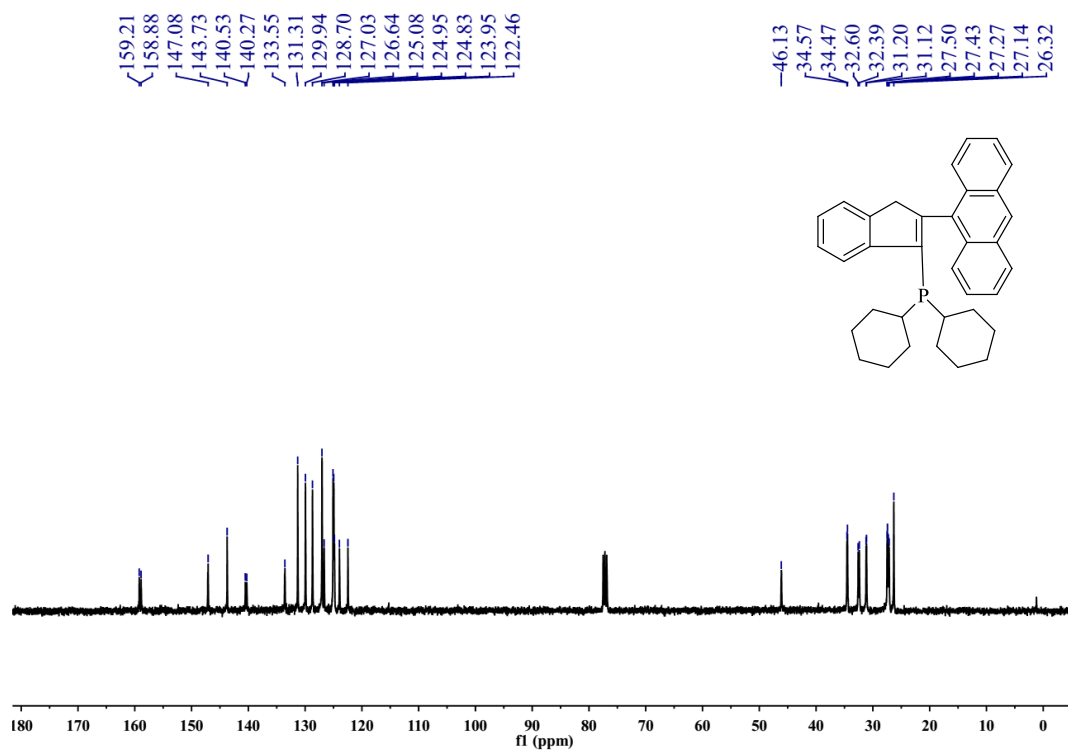

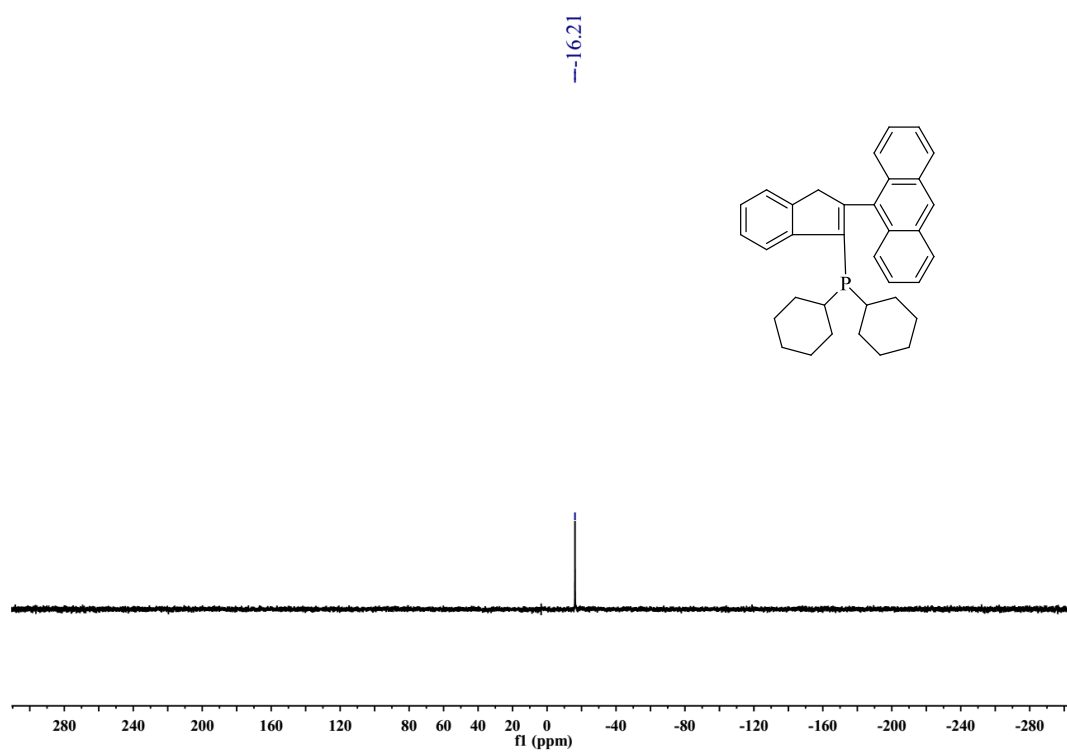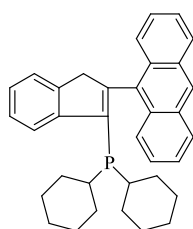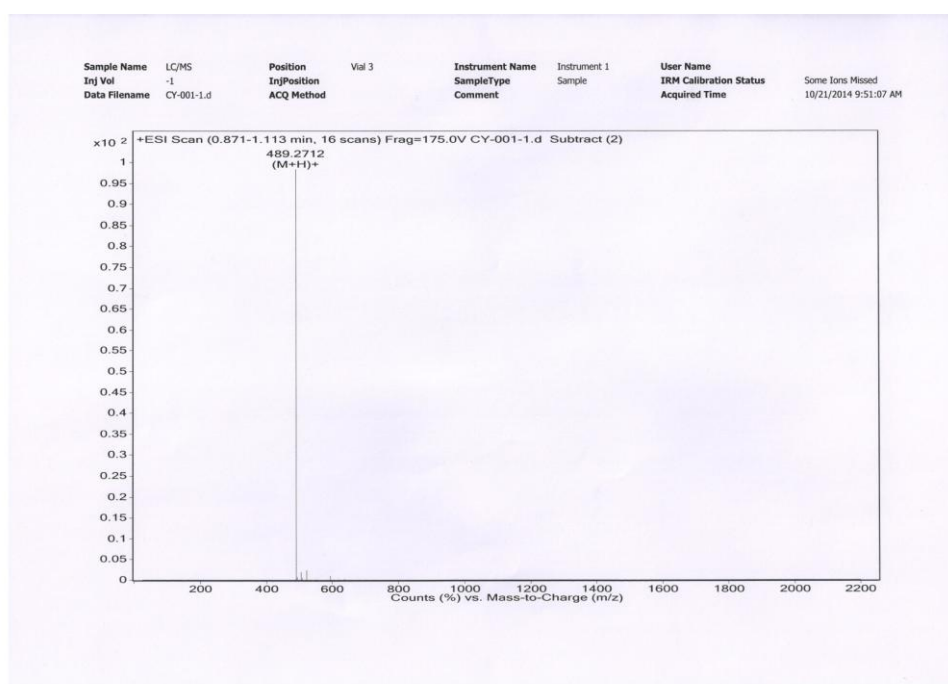

## <sup>1</sup>H NMR spectra of coupling products

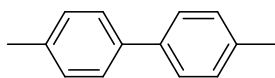

4, 4'-dimethyl-1, 1'-biphenyl

White solid. <sup>1</sup>H NMR (400 MHz, CDCl<sub>3</sub>): δ 7.47 (d, *J* = 8.1 Hz, 4H), 7.23 (d, *J* = 8.0 Hz, 4H), 2.38 (s, 6H) ppm. Data is consistent with that reported in the literature.<sup>2</sup>

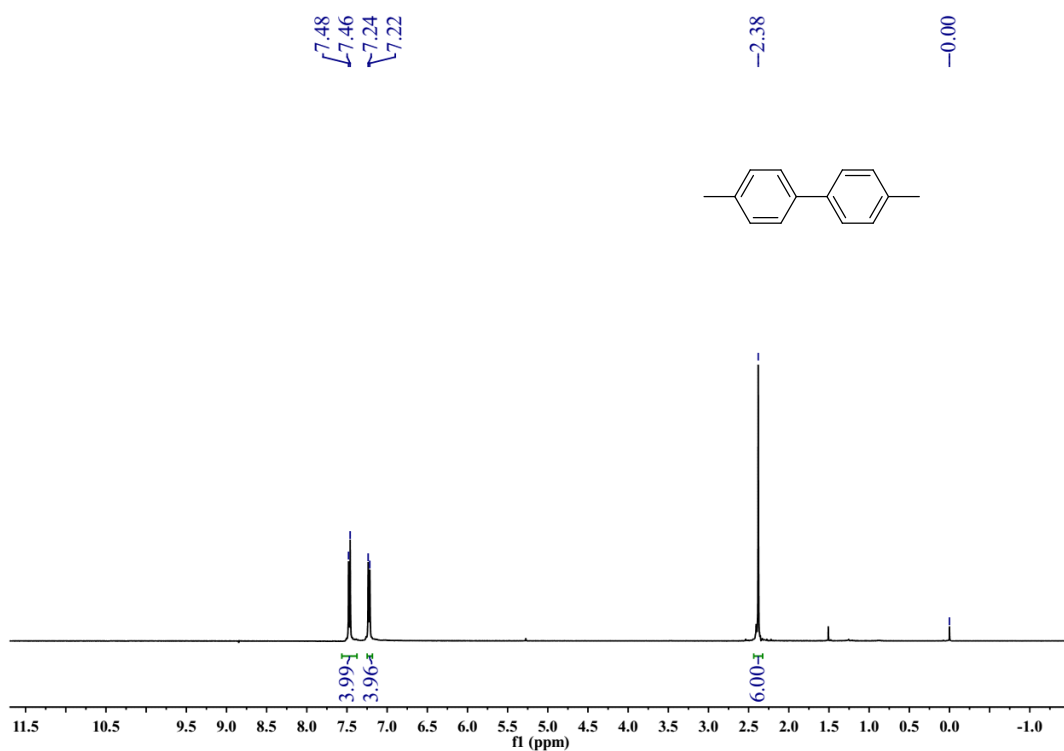

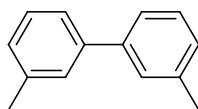

3, 3'-dimethyl-1, 1'-biphenyl

Colorless oil.  $^1\text{H}$  NMR (400 MHz,  $\text{CDCl}_3$ ):  $\delta$  7.37 (d,  $J = 9.3$  Hz, 4H), 7.29 (t,  $J = 7.5$  Hz, 2H), 7.12 (d,  $J = 7.1$  Hz, 2H), 2.39 (s, 6H) ppm. Data is consistent with that reported in the literature.<sup>3</sup>

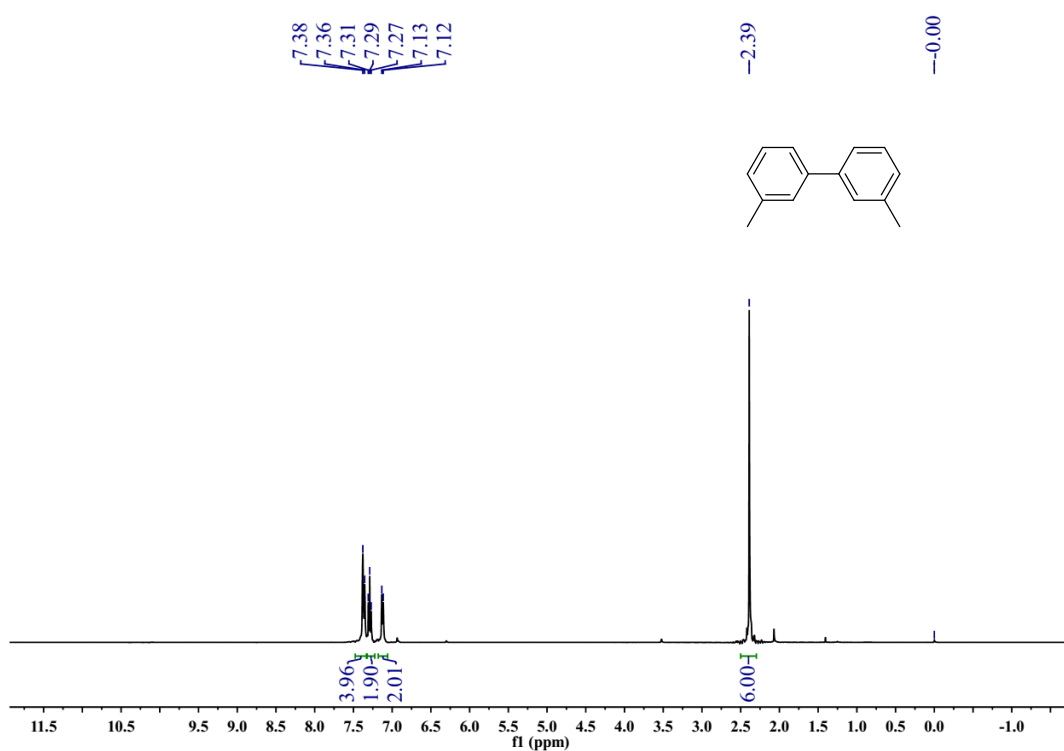

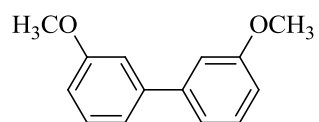

3, 3'-dimethoxy-1, 1'-biphenyl

Colorless oil.  $^1\text{H}$  NMR (400 MHz,  $\text{CDCl}_3$ ):  $\delta$  7.32 (t,  $J = 7.9$  Hz, 2H), 7.19-7.15 (m, 2H), 7.14-7.07 (m, 2H), 6.94-6.83 (m, 2H), 3.82 (s, 6H) ppm. Data is consistent with that reported in the literature.<sup>4</sup>

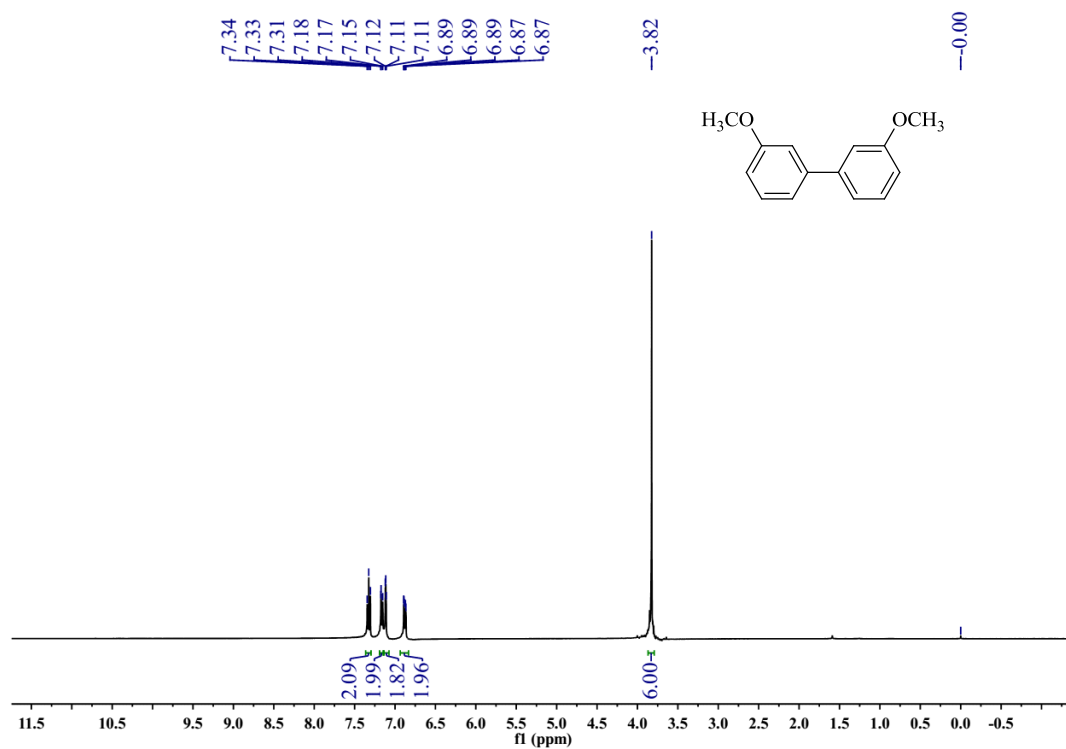

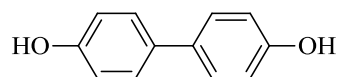

1, 1'-biphenyl-4, 4'-diol

White solid.  $^1\text{H}$  NMR (400 MHz,  $\text{CDCl}_3$ ):  $\delta$  7.19 (dd,  $J = 6.7, 2.1$  Hz, 4H), 6.76 (dd,  $J = 6.7, 2.1$  Hz, 4H), 4.52 (br, 2H) ppm. Data is consistent with that reported in the literature.<sup>5</sup>

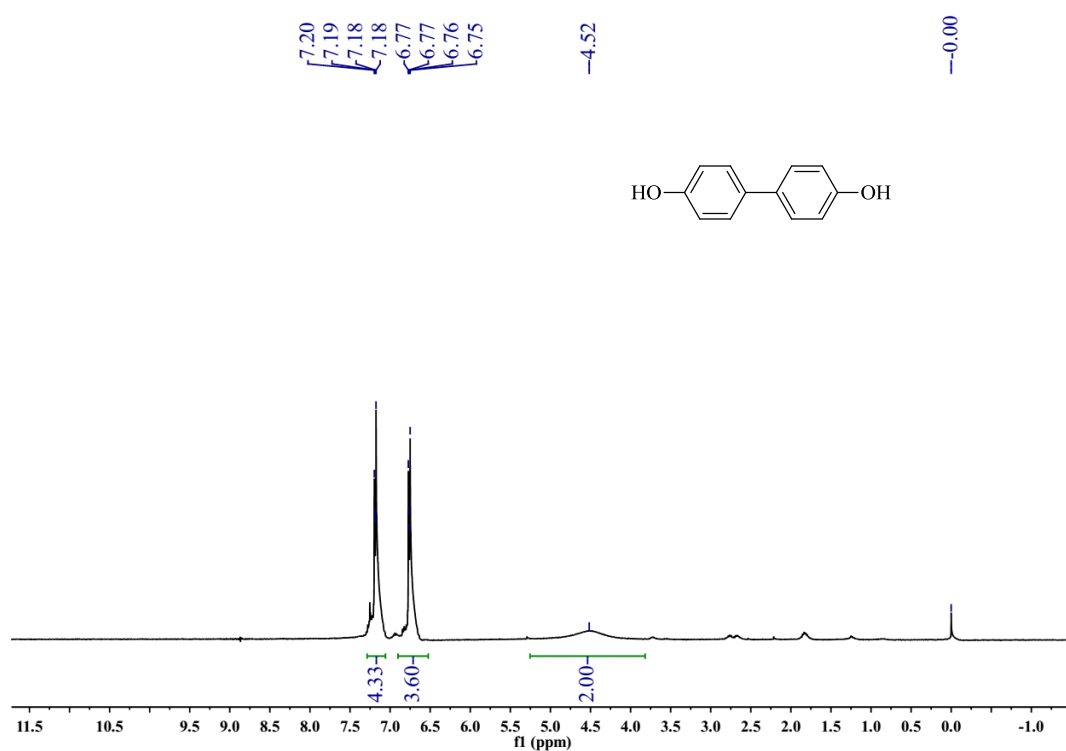

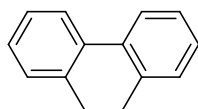

2, 2'-dimethyl-1, 1'-biphenyl

Colorless oil.  $^1\text{H}$  NMR (400 MHz,  $\text{CDCl}_3$ ):  $\delta$  7.25-7.18 (m, 6H), 7.09 (d,  $J = 8.0$  Hz, 2H), 2.05 (s, 6H) ppm. Data is consistent with that reported in the literature.<sup>6</sup>

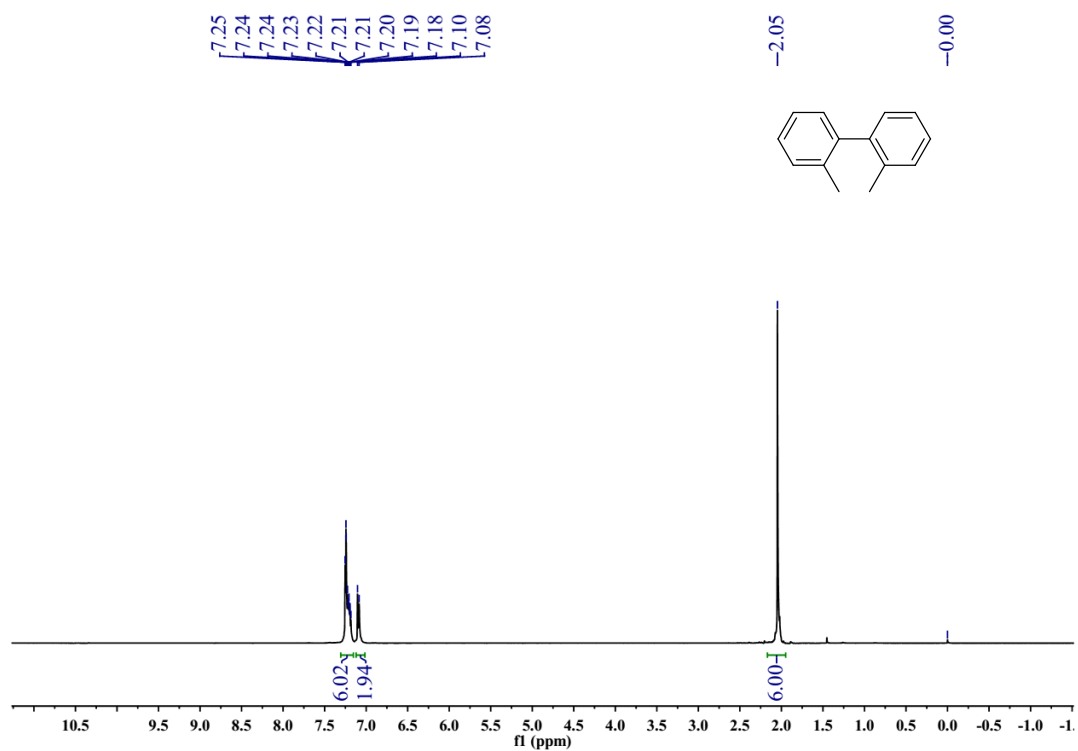

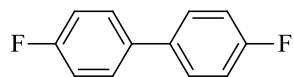

4, 4'-difluoro-1, 1'-biphenyl

White solid.  $^1\text{H}$  NMR (400 MHz,  $\text{CDCl}_3$ ):  $\delta$  7.54-7.44 (m, 4H), 7.09-7.14 (m, 4H) ppm. Data is consistent with that reported in the literature.<sup>7</sup>

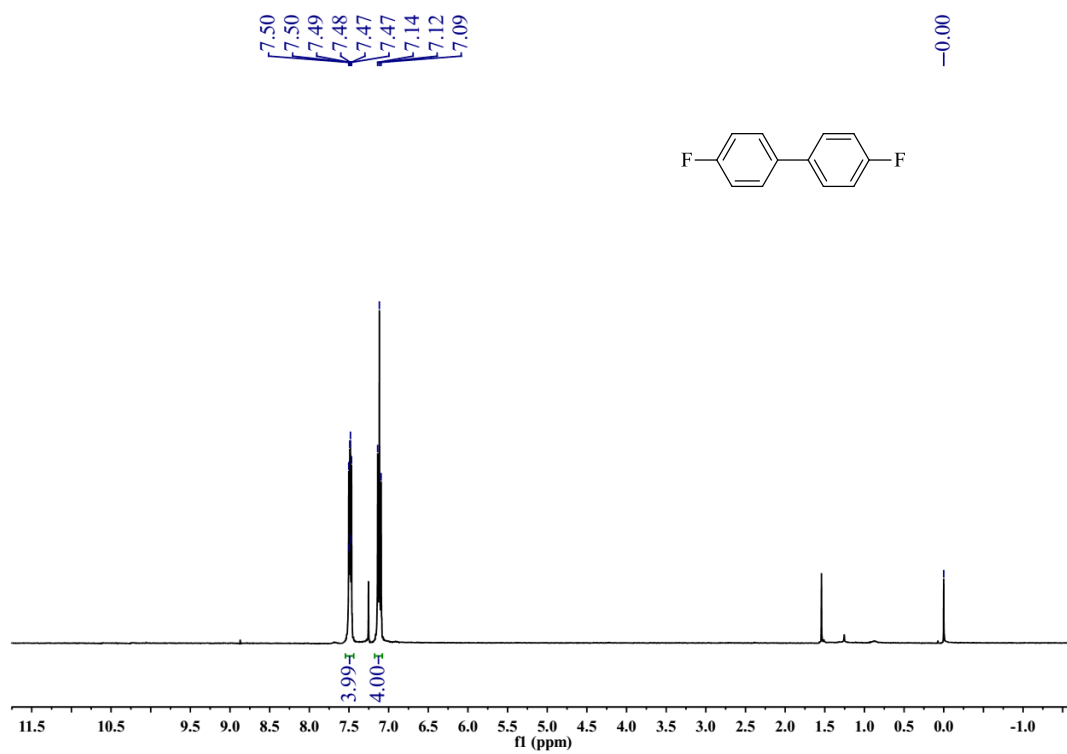

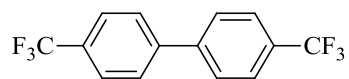

4, 4'-bis(trifluoromethyl)-1, 1'-biphenyl

White solid.  $^1\text{H}$  NMR (400 MHz,  $\text{CDCl}_3$ ):  $\delta$  7.69-7.75 (m, 8H) ppm. Data is consistent with that reported in the literature.<sup>7</sup>

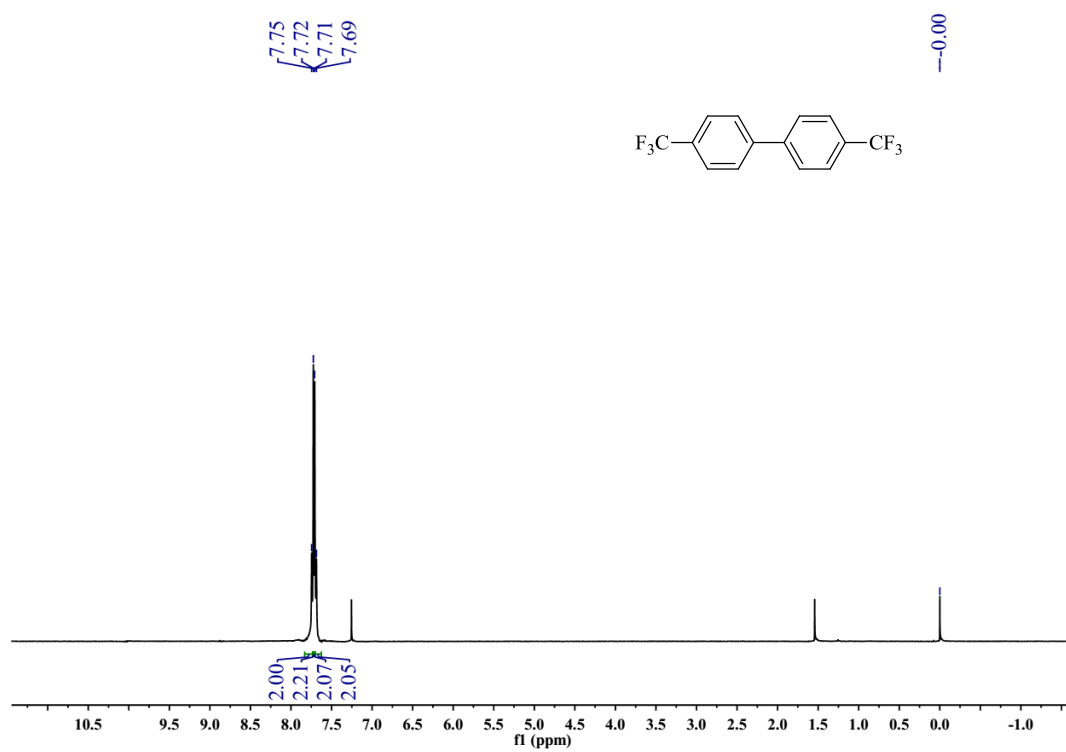

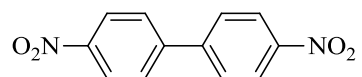

4, 4'-dinitro-1, 1'-biphenyl

Yellow solid.  $^1\text{H}$  NMR (400 MHz,  $\text{CDCl}_3$ ):  $\delta$  8.37 (d,  $J = 8.0$  Hz, 4H), 7.79 (d,  $J = 8.0$  Hz, 4H) ppm. Data is consistent with that reported in the literature.<sup>8</sup>

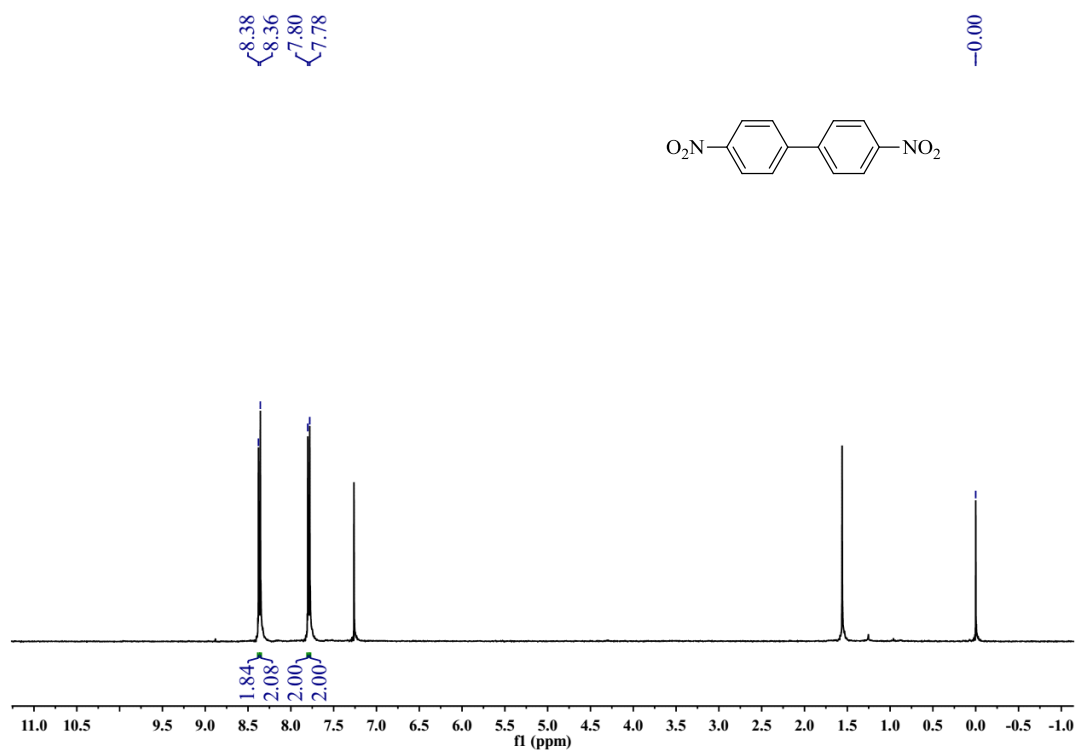

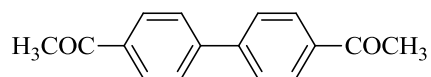

1, 1'-([1, 1'-biphenyl]-4, 4'-diyl) diethanone

Yellow solid.  $^1\text{H}$  NMR (400 MHz,  $\text{CDCl}_3$ ):  $\delta$  8.06 (d,  $J = 8.0$  Hz, 4H), 7.72 (d,  $J = 8.0$  Hz, 4H), 2.65 (s, 6H) ppm. Data is consistent with that reported in the literature.<sup>9</sup>

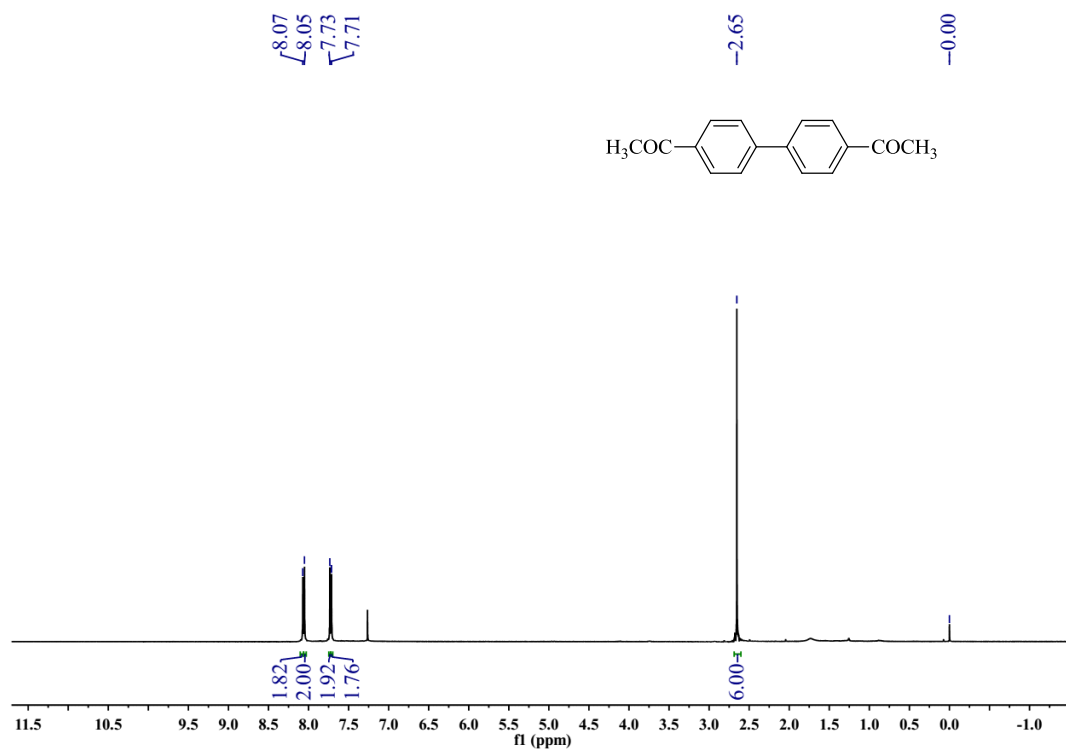

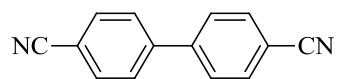

[1, 1'-biphenyl]-4, 4'-dicarbonitrile

Yellow solid.  $^1\text{H}$  NMR (400 MHz,  $\text{CDCl}_3$ ):  $\delta$  7.79 (d,  $J = 8.0$  Hz, 4H), 7.69 (d,  $J = 8.3$  Hz, 4H) ppm. Data is consistent with that reported in the literature.<sup>10</sup>

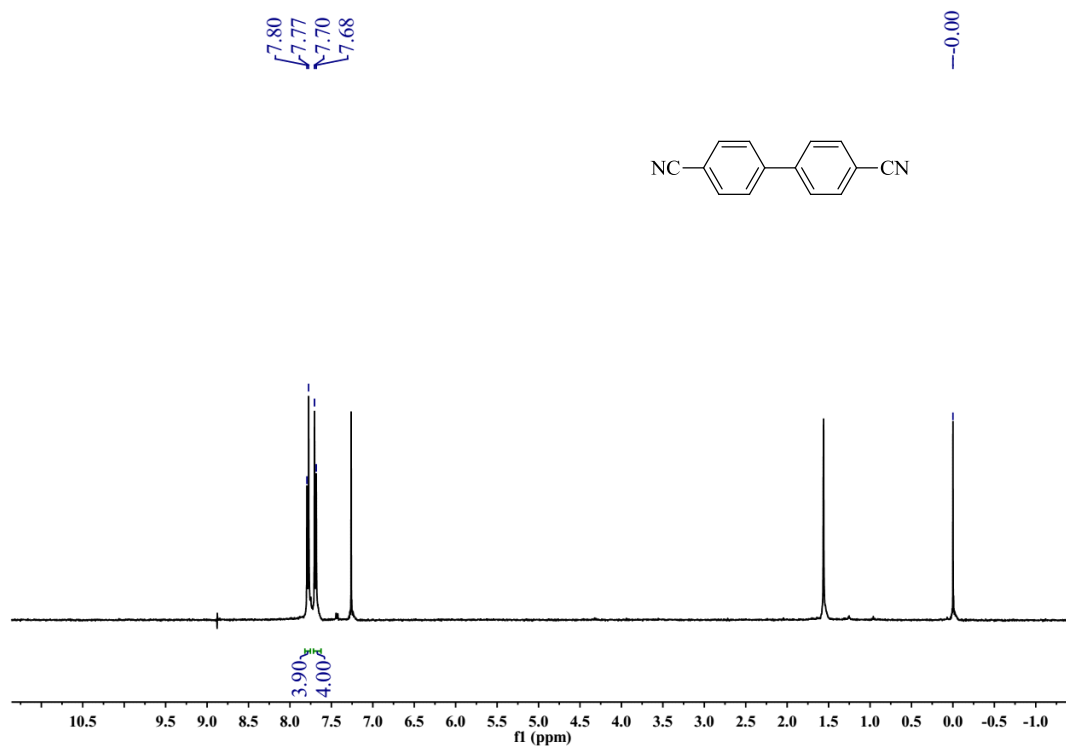

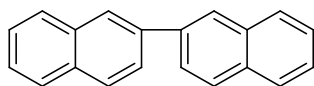

2, 2'-binaphthalene

Yellow solid.  $^1\text{H}$  NMR (400 MHz,  $\text{CDCl}_3$ ):  $\delta$  8.17 (s, 2H), 7.92 (dt,  $J = 8.5, 7.8$  Hz, 8H), 7.56-7.47 (m, 4H) ppm. Data is consistent with that reported in the literature.<sup>4</sup>

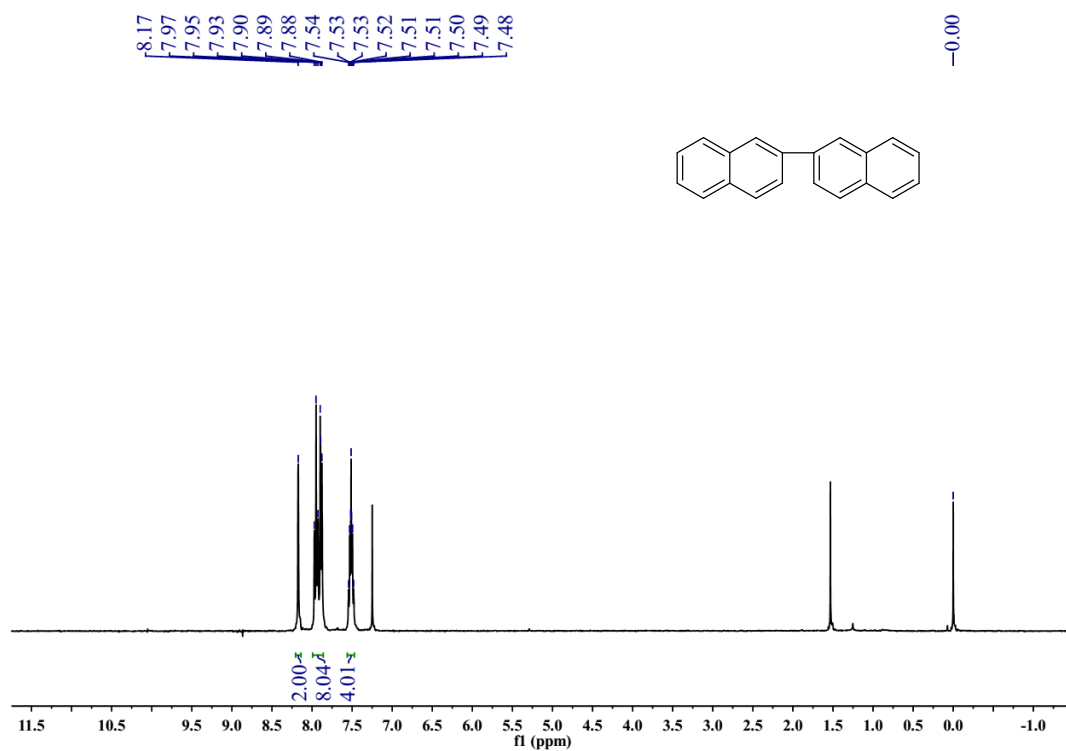

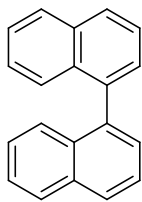

1, 1'-binaphthalene

White solid.  $^1\text{H}$  NMR (400 MHz,  $\text{CDCl}_3$ ):  $\delta$  7.94 (dd,  $J = 8.1, 3.6$  Hz, 4H), 7.65-7.55 (m, 2H), 7.54-7.41 (m, 4H), 7.39 (d,  $J = 8.4$  Hz, 2H), 7.31-7.18 (m, 2H) ppm. Data is consistent with that reported in the literature.<sup>11</sup>

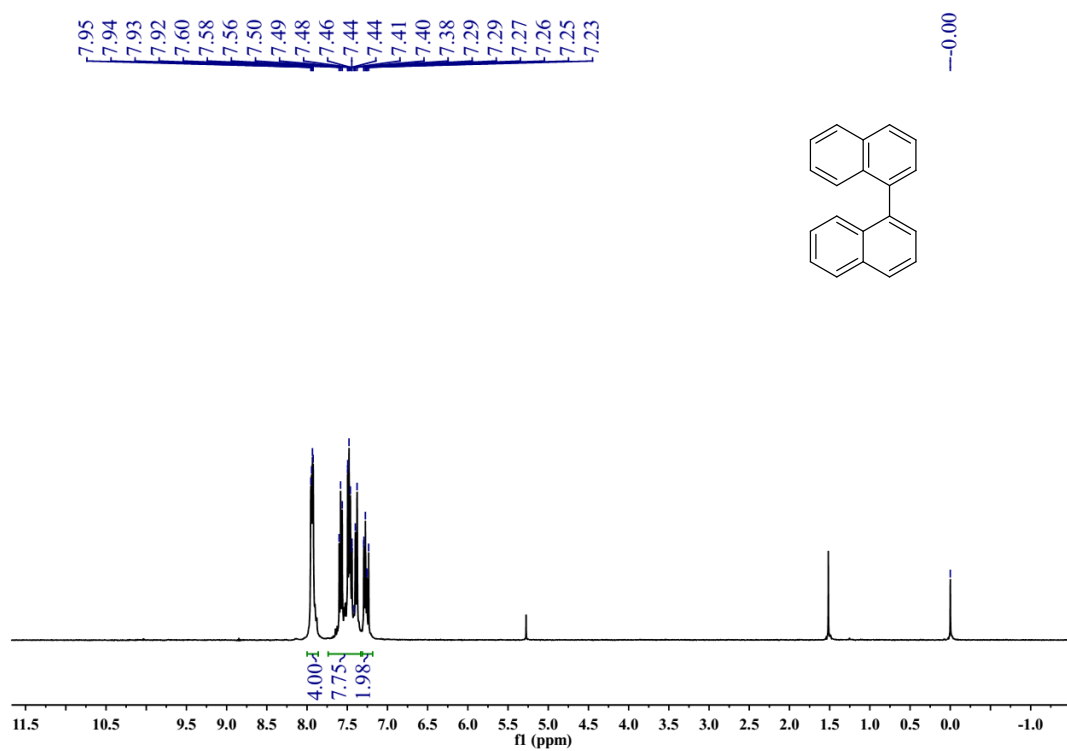

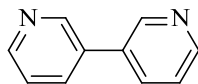

### 3, 3'-bipyridine

White solid.  $^1\text{H}$  NMR (400 MHz,  $\text{CDCl}_3$ ):  $\delta$  8.85 (d,  $J = 2.0$  Hz, 2H), 8.67 (dd,  $J = 4.8$ , 1.5 Hz, 2H), 7.94-7.87 (m, 2H), 7.42 (dd,  $J = 7.7$ , 4.9 Hz, 2H) ppm. Data is consistent with that reported in the literature.<sup>12</sup>

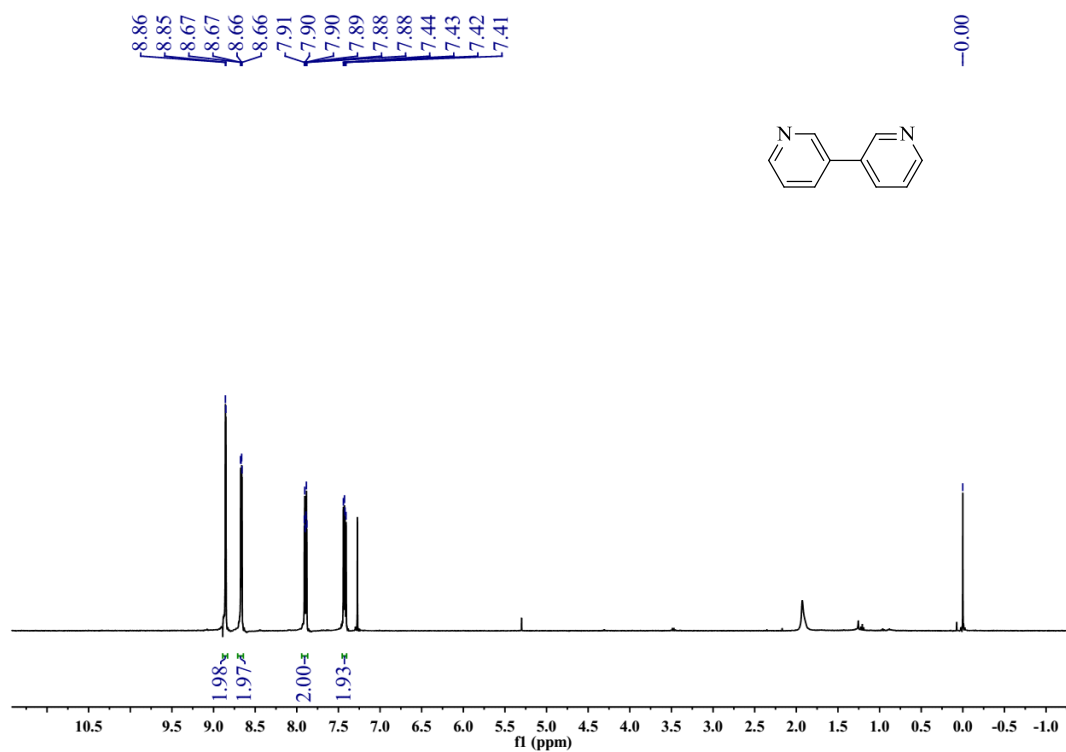

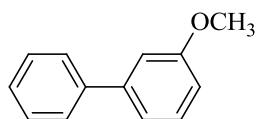

3-methoxy-1, 1'-biphenyl

Yellow oil.  $^1\text{H}$  NMR (400 MHz,  $\text{CDCl}_3$ ):  $\delta$  7.58 (d,  $J = 7.6$  Hz, 2H), 7.43 (t,  $J = 7.4$  Hz, 2H), 7.35 (t,  $J = 7.6$  Hz, 2H), 7.18 (d,  $J = 7.6$  Hz, 1H), 7.12 (s, 1H), 6.89 (d,  $J = 8.1$  Hz, 1H), 3.85 (s, 3H) ppm. Data is consistent with that reported in the literature.<sup>13</sup>

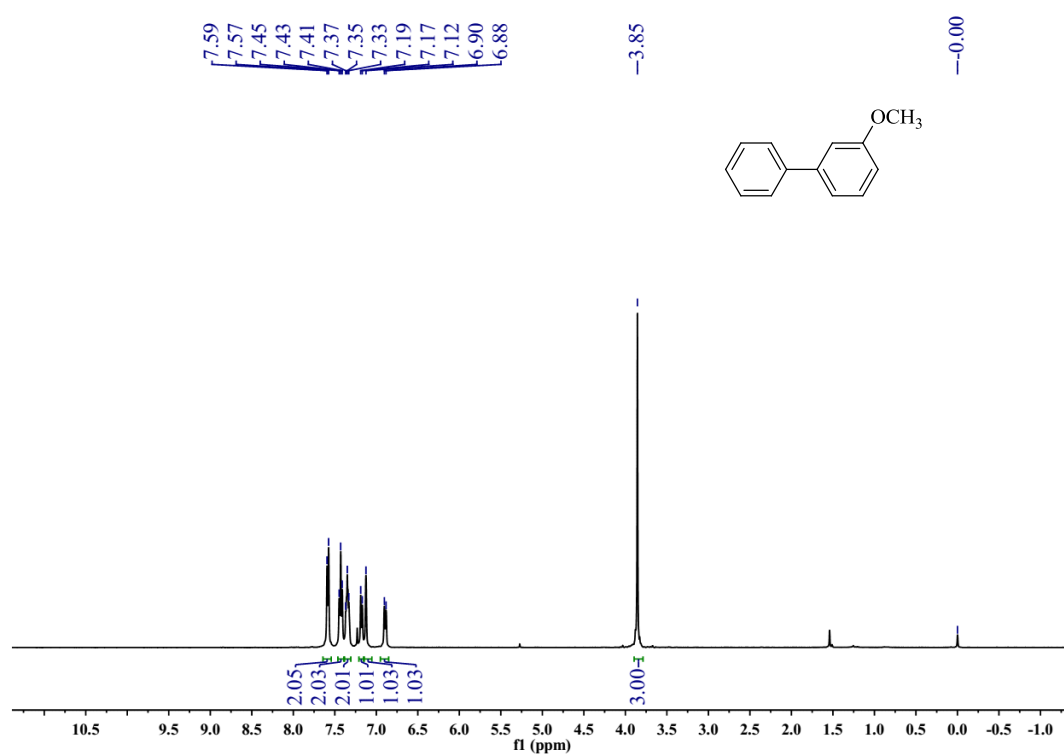

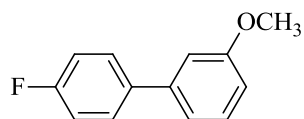

4'-fluoro-3-methoxy-1,1'-biphenyl

Yellow oil.  $^1\text{H}$  NMR (400 MHz,  $\text{CDCl}_3$ ):  $\delta$  7.56 – 7.51 (m, 2H), 7.34 (t,  $J = 7.9$  Hz, 1H), 7.12 (dd,  $J = 12.0, 5.3$  Hz, 3H), 7.08 – 7.06 (m, 1H), 6.89 (ddd,  $J = 8.2, 2.5, 0.8$  Hz, 1H), 3.86 (s, 3H) ppm. Data is consistent with that reported in the literature.<sup>14</sup>

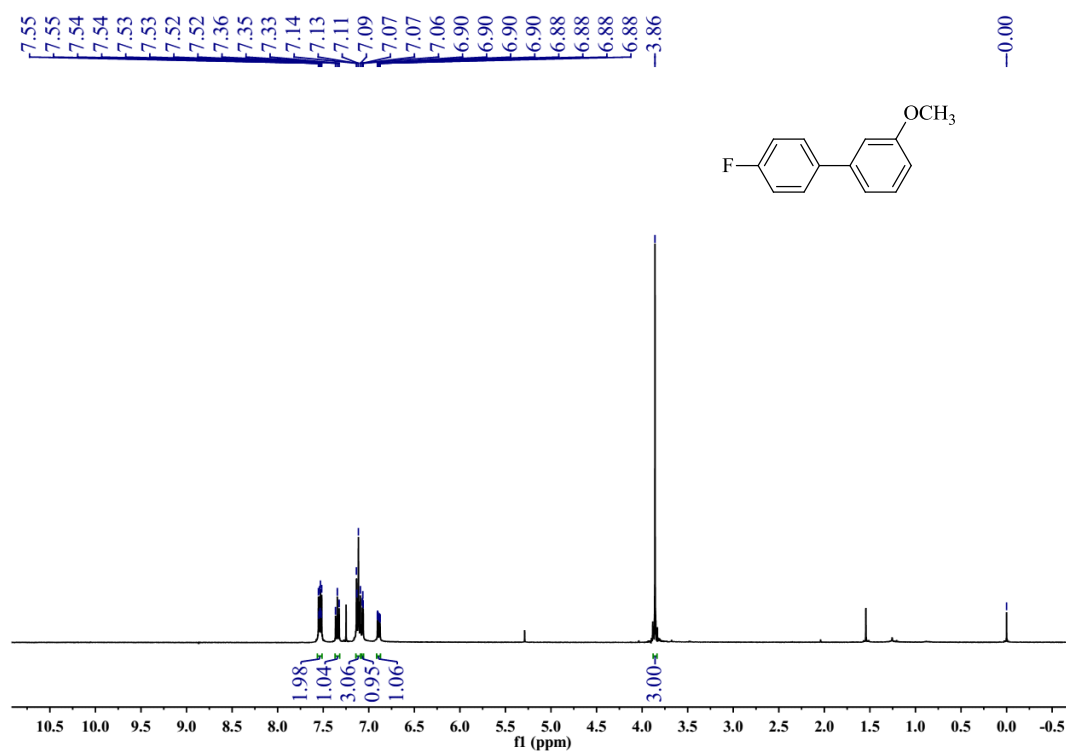

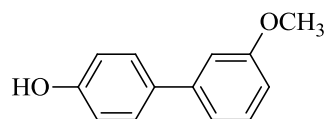

3'-methoxy-[1, 1'-biphenyl]-4-ol

White solid.  $^1\text{H}$  NMR (400 MHz,  $\text{CDCl}_3$ ):  $\delta$  7.45 (d,  $J = 8.4$  Hz, 2H), 7.31 (t,  $J = 8.0$  Hz, 1H), 7.12 (d,  $J = 7.7$  Hz, 1H), 7.07 (d,  $J = 1.8$  Hz, 1H), 6.92-6.78 (m, 3H), 5.85 (br, 1H), 3.84 (s, 3H) ppm. Data is consistent with that reported in the literature.<sup>5</sup>

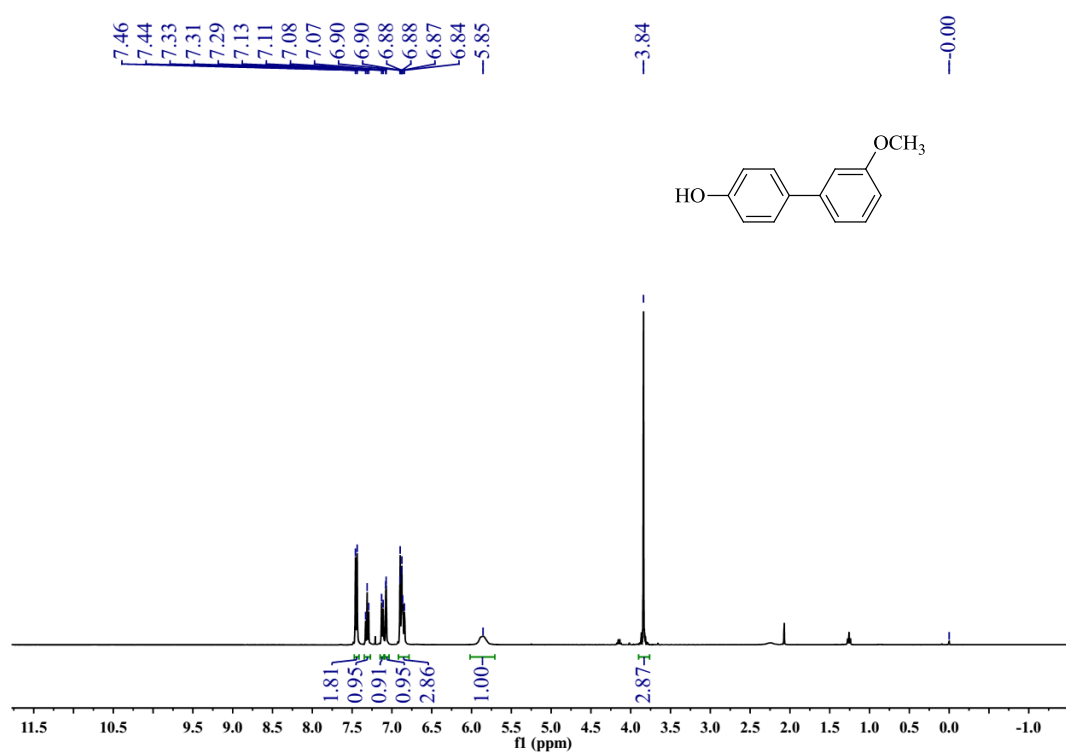

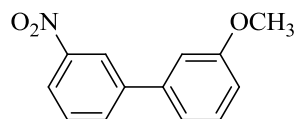

### 3-methoxy-3'-nitro-1, 1'-biphenyl

Yellow solid.  $^1\text{H}$  NMR (400 MHz,  $\text{CDCl}_3$ ):  $\delta$  8.45 (s, 1H), 8.21 (dd,  $J = 8.2, 1.3$  Hz, 1H), 7.91 (d,  $J = 7.8$  Hz, 1H), 7.61 (t,  $J = 8.0$  Hz, 1H), 7.41 (t,  $J = 8.0$  Hz, 1H), 7.21 (d,  $J = 7.7$  Hz, 1H), 7.16-7.12 (m, 1H), 6.98 (dd,  $J = 8.2, 2.2$  Hz, 1H), 3.89 (s, 3H) ppm. Data is consistent with that reported in the literature.<sup>15</sup>

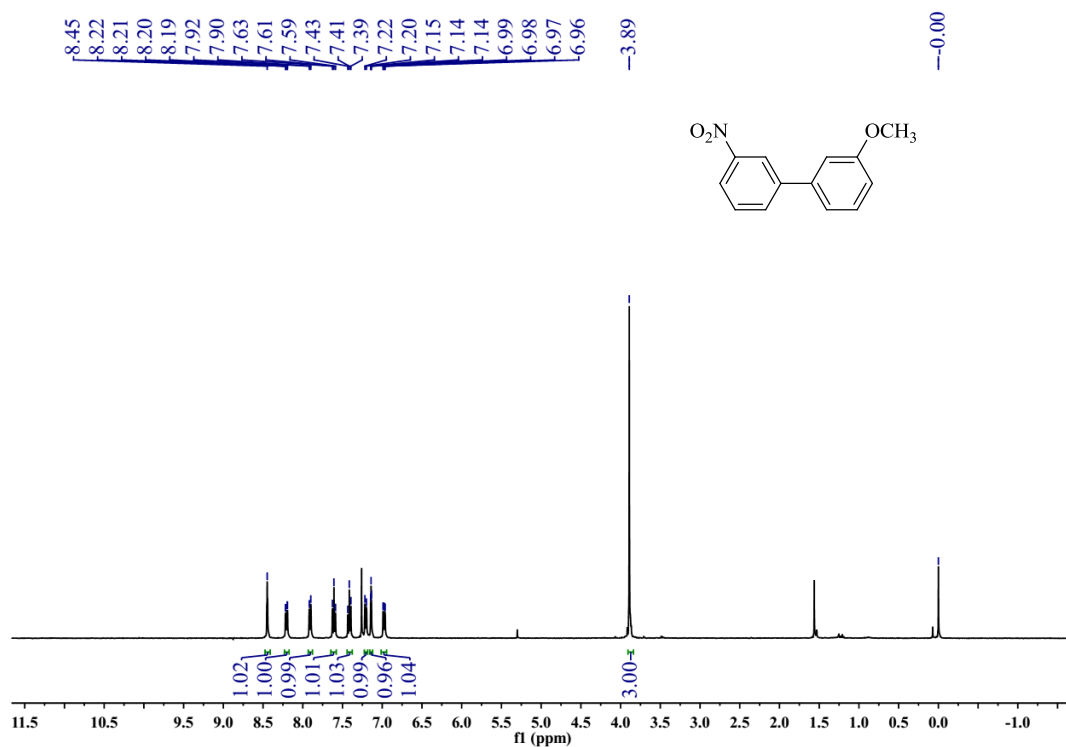

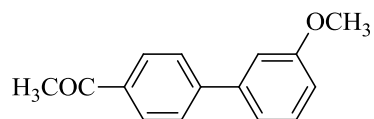

1-(3'-methoxy-[1, 1'-biphenyl]-4-yl) ethanone

Light red solid.  $^1\text{H}$  NMR (400 MHz,  $\text{CDCl}_3$ ):  $\delta$  8.03 (d,  $J = 6.7$  Hz, 2H), 7.68 (d,  $J = 6.7$  Hz, 2H), 7.39 (t,  $J = 6.9$  Hz, 1H), 7.21 (d,  $J = 7.3$  Hz, 1H), 7.15 (s, 1H), 6.95 (d,  $J = 7.9$  Hz, 1H), 3.88 (s, 3H), 2.64 (s, 3H) ppm. Data is consistent with that reported in the literature.<sup>16</sup>

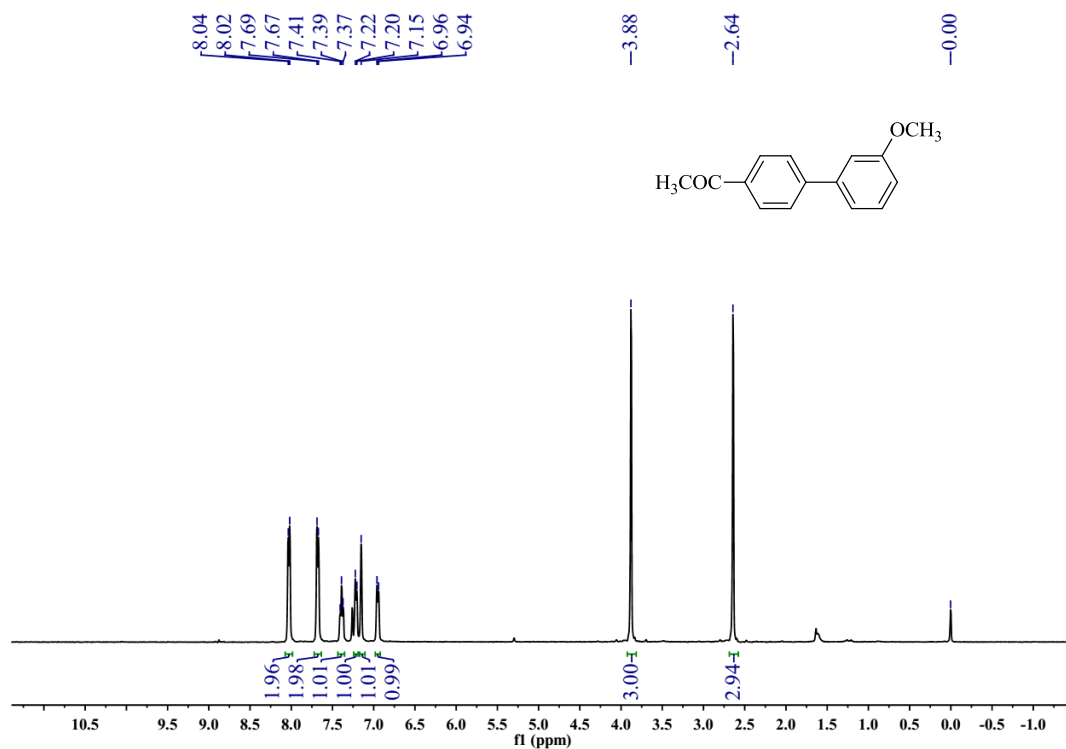

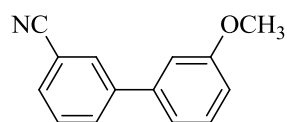

3'-methoxy-[1, 1'-biphenyl]-3-carbonitrile

Yellow solid.  $^1\text{H}$  NMR (400 MHz,  $\text{CDCl}_3$ ):  $\delta$  7.86 (s, 1H), 7.81 (d,  $J = 7.9$  Hz, 1H), 7.63 (d,  $J = 7.7$  Hz, 1H), 7.54 (t,  $J = 7.8$  Hz, 1H), 7.40 (t,  $J = 8.0$  Hz, 1H), 7.14 (d,  $J = 7.7$  Hz, 1H), 7.08 (s, 1H), 6.96 (dd,  $J = 8.2, 2.3$  Hz, 1H), 3.88 (s, 3H) ppm. Data is consistent with that reported in the literature.<sup>17</sup>

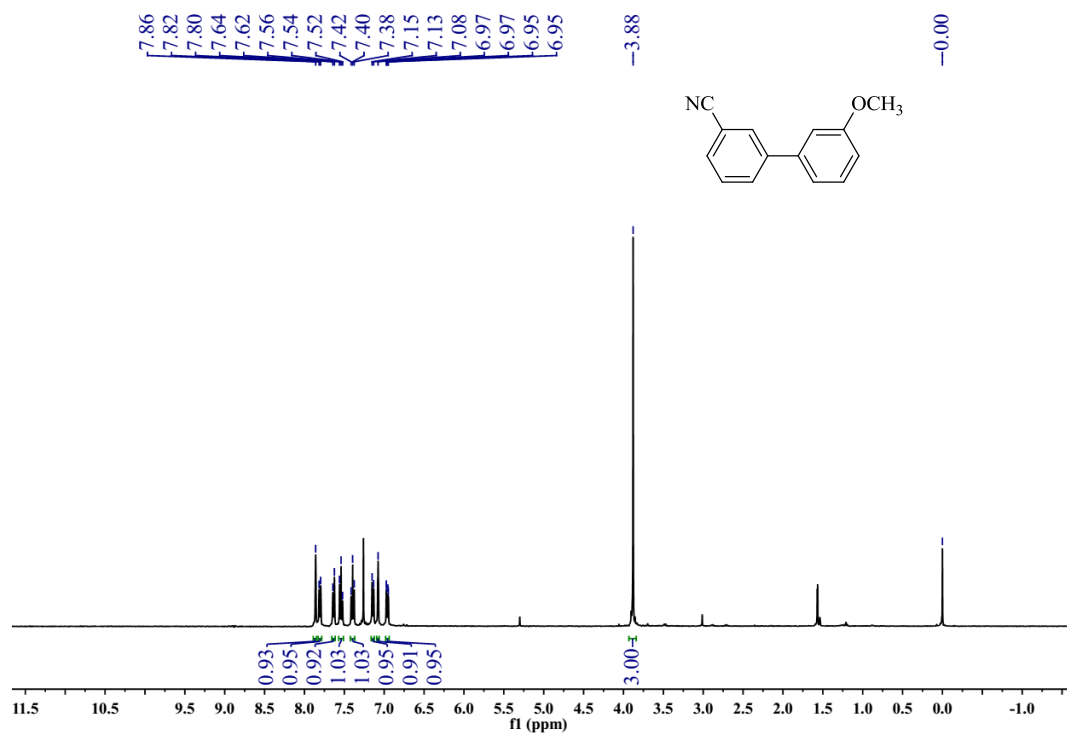

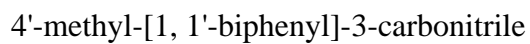

Chemical structure: Cc1ccc(cc1)-c2ccc(cc2)C#N

Chemical shift values (ppm): 7.85, 7.84, 7.81, 7.80, 7.80, 7.79, 7.78, 7.78, 7.62, 7.61, 7.61, 7.60, 7.59, 7.59, 7.54, 7.52, 7.50, 7.47, 7.45, 7.30, 7.28, 7.26, -2.41, 0.00

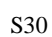

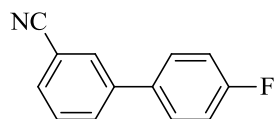

4'-fluoro-[1, 1'-biphenyl]-3-carbonitrile

Yellow solid.  $^1\text{H}$  NMR (400 MHz,  $\text{CDCl}_3$ ):  $\delta$  7.82 (t,  $J = 1.5$  Hz, 1H), 7.79-7.75 (m, 1H), 7.65-7.61 (m, 1H), 7.57-7.51 (m, 3H), 7.17 (t,  $J = 8.6$  Hz, 2H) ppm. Data is consistent with that reported in the literature.<sup>19</sup>

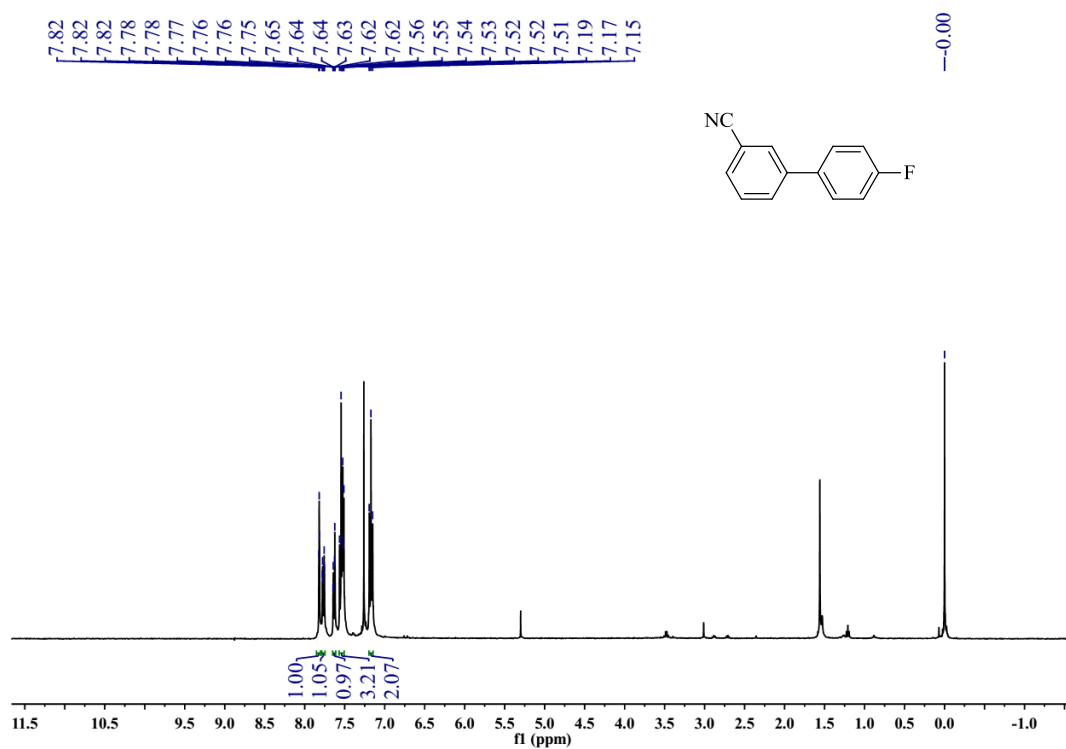

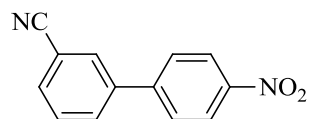

4'-nitro-[1, 1'-biphenyl]-3-carbonitrile

Yellow solid.  $^1\text{H}$  NMR (400 MHz,  $\text{CDCl}_3$ ):  $\delta$  8.36 (d,  $J = 8.8$  Hz, 2H), 7.91 (s, 1H), 7.86 (d,  $J = 7.6$  Hz, 1H), 7.73 (d,  $J = 8.8$  Hz, 3H), 7.63 (t,  $J = 7.8$  Hz, 1H) ppm.

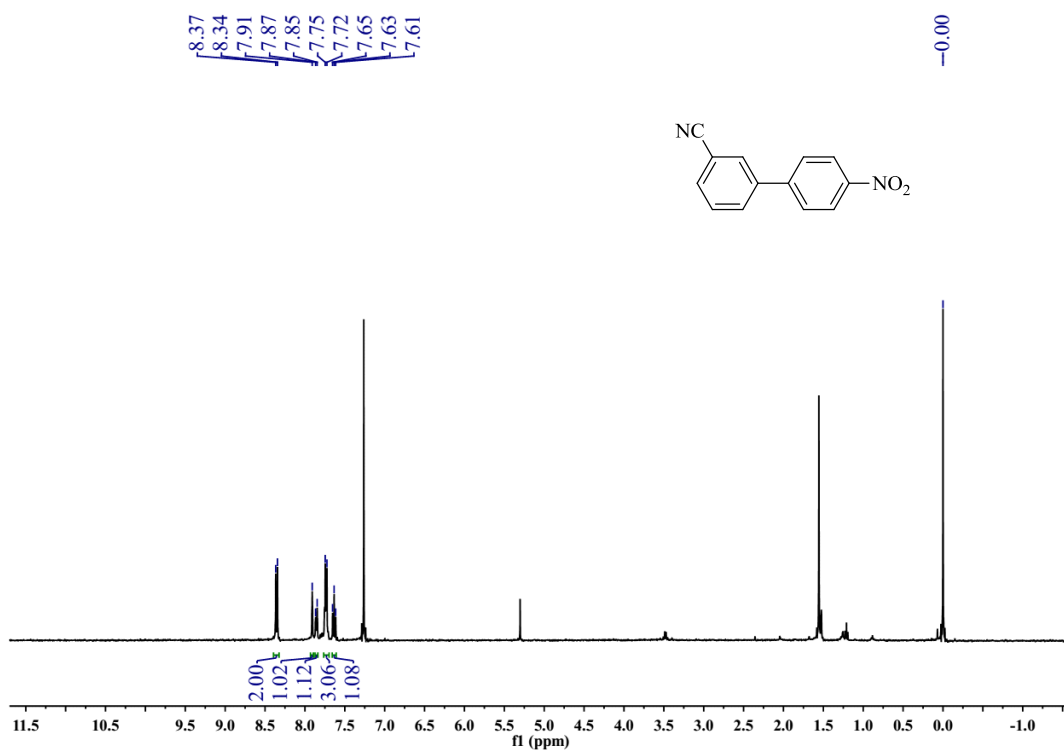

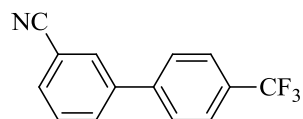

4'-(trifluoromethyl)-[1, 1'-biphenyl]-3-carbonitrile

White solid.  $^1\text{H}$  NMR (400 MHz,  $\text{CDCl}_3$ ):  $\delta$  7.88 (s, 1H), 7.83 (d,  $J = 7.7$  Hz, 1H), 7.75 (d,  $J = 7.5$  Hz, 2H), 7.69 (t,  $J = 8.7$  Hz, 3H), 7.60 (t,  $J = 7.7$  Hz, 1H) ppm. Data is consistent with that reported in the literature.<sup>20</sup>

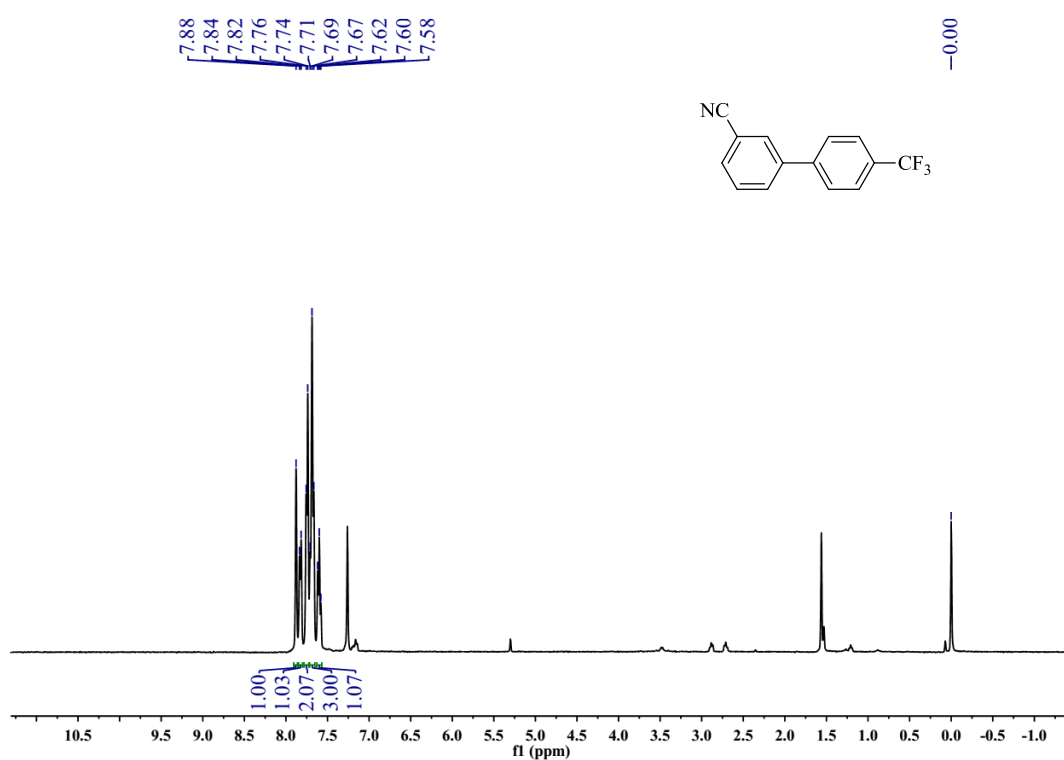

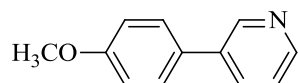

### 3-(4-methoxyphenyl) pyridine

Yellow solid.  $^1\text{H}$  NMR (400 MHz,  $\text{CDCl}_3$ ):  $\delta$  8.82 (d,  $J = 1.6$  Hz, 1H), 8.54 (dd,  $J = 4.8, 1.5$  Hz, 1H), 7.87 – 7.78 (m, 1H), 7.52 (d,  $J = 8.8$  Hz, 2H), 7.33 (dd,  $J = 7.6, 5.1$  Hz, 1H), 7.01 (d,  $J = 8.8$  Hz, 2H), 3.86 (s, 3H) ppm. Data is consistent with that reported in the literature.<sup>21</sup>

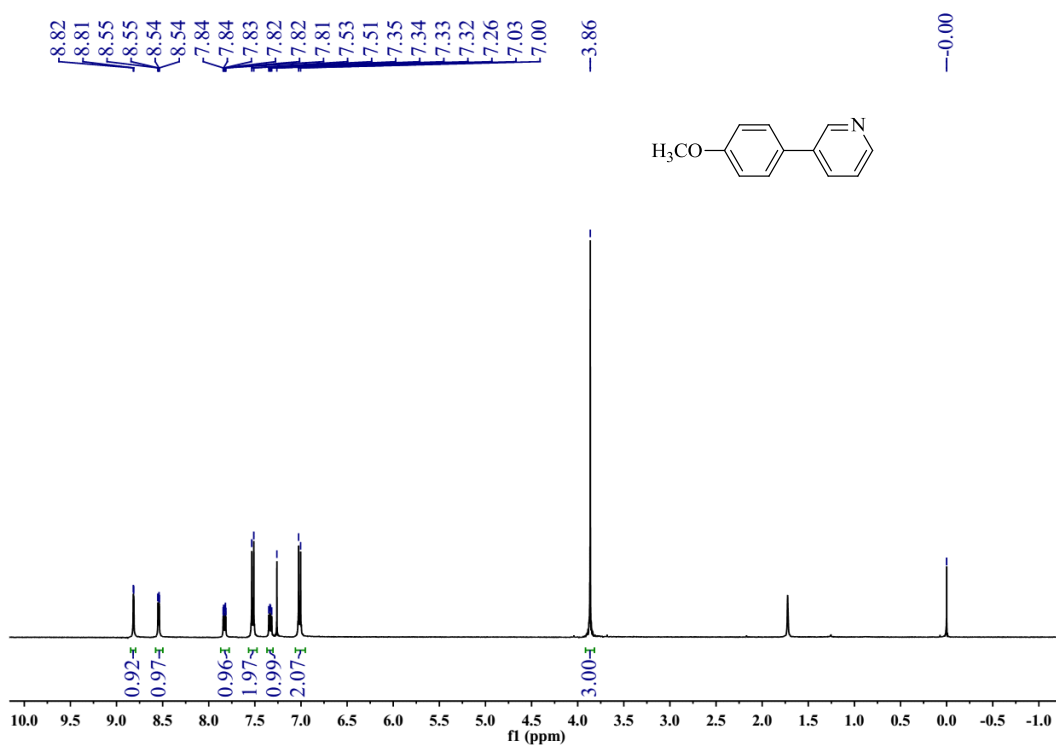

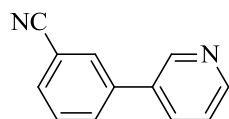

### 3-(pyridin-3-yl) benzonitrile

Yellow solid.  $^1\text{H}$  NMR (400 MHz,  $\text{CDCl}_3$ ):  $\delta$  8.85 (s, 1H), 8.68 (d,  $J = 3.7$  Hz, 1H), 7.92-7.86 (m, 2H), 7.85-7.80 (m, 1H), 7.71 (dt,  $J = 7.8, 1.4$  Hz, 1H), 7.62 (t,  $J = 7.8$  Hz, 1H), 7.44 (dd,  $J = 7.6, 4.9$  Hz, 1H) ppm. Data is consistent with that reported in the literature.<sup>22</sup>

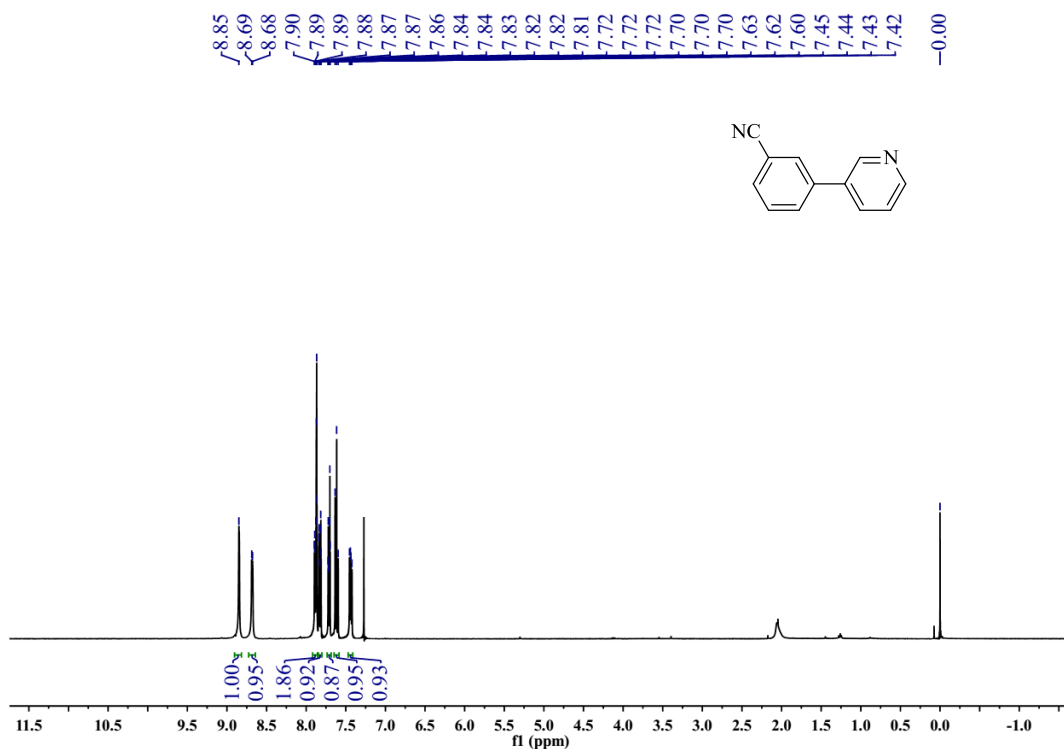

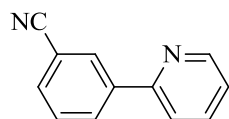

3-(pyridin-2-yl) benzonitrile

Yellow solid.  $^1\text{H}$  NMR (400 MHz,  $\text{CDCl}_3$ ):  $\delta$  8.73 (s, 1H), 8.33 (s, 1H), 8.24 (d,  $J = 7.9$  Hz, 1H), 7.80 (d,  $J = 7.9$  Hz, 1H), 7.72 (dd,  $J = 17.0, 7.3$  Hz, 2H), 7.59 (t,  $J = 7.9$  Hz, 1H), 7.32 (s, 1H) ppm. Data is consistent with that reported in the literature.<sup>23</sup>

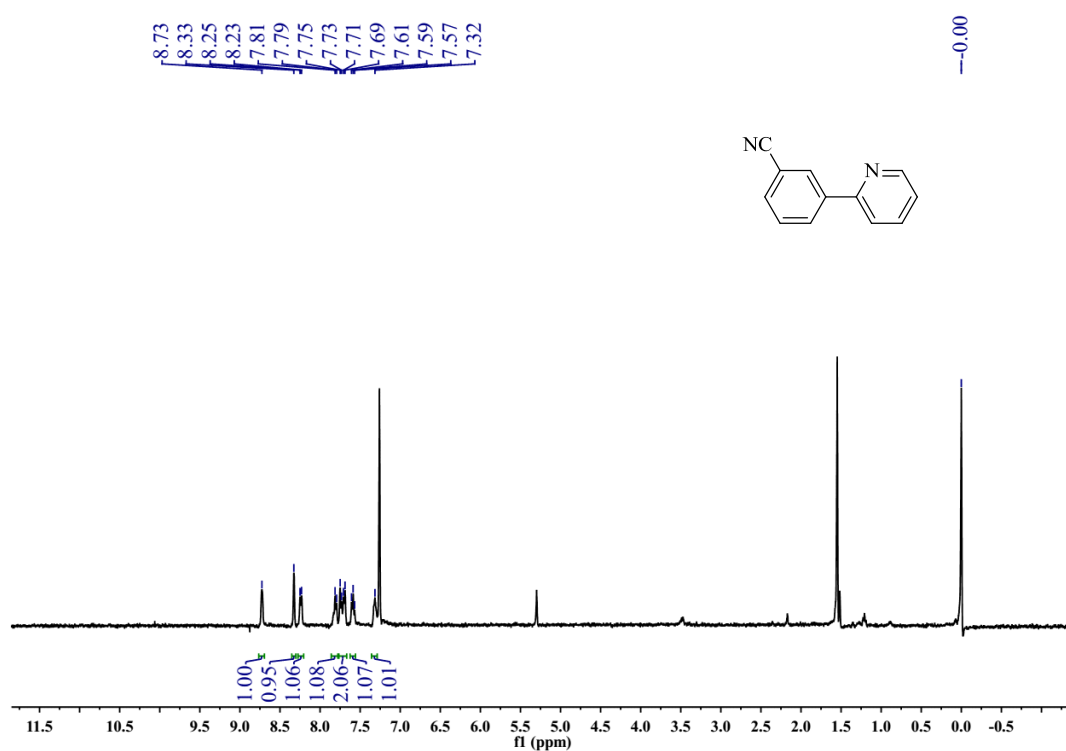

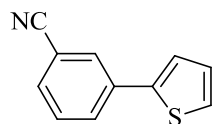

### 3-(thiophen-2-yl) benzonitrile

Yellow solid.  $^1\text{H}$  NMR (400 MHz,  $\text{CDCl}_3$ ):  $\delta$  7.88 (t,  $J = 1.6$  Hz, 1H), 7.84-7.79 (m, 1H), 7.55 (dt,  $J = 7.7, 1.3$  Hz, 1H), 7.48 (t,  $J = 7.8$  Hz, 1H), 7.37 (dt,  $J = 3.5, 1.2$  Hz, 2H), 7.12 (dd,  $J = 5.0, 3.8$  Hz, 1H) ppm. Data is consistent with that reported in the literature.<sup>24</sup>

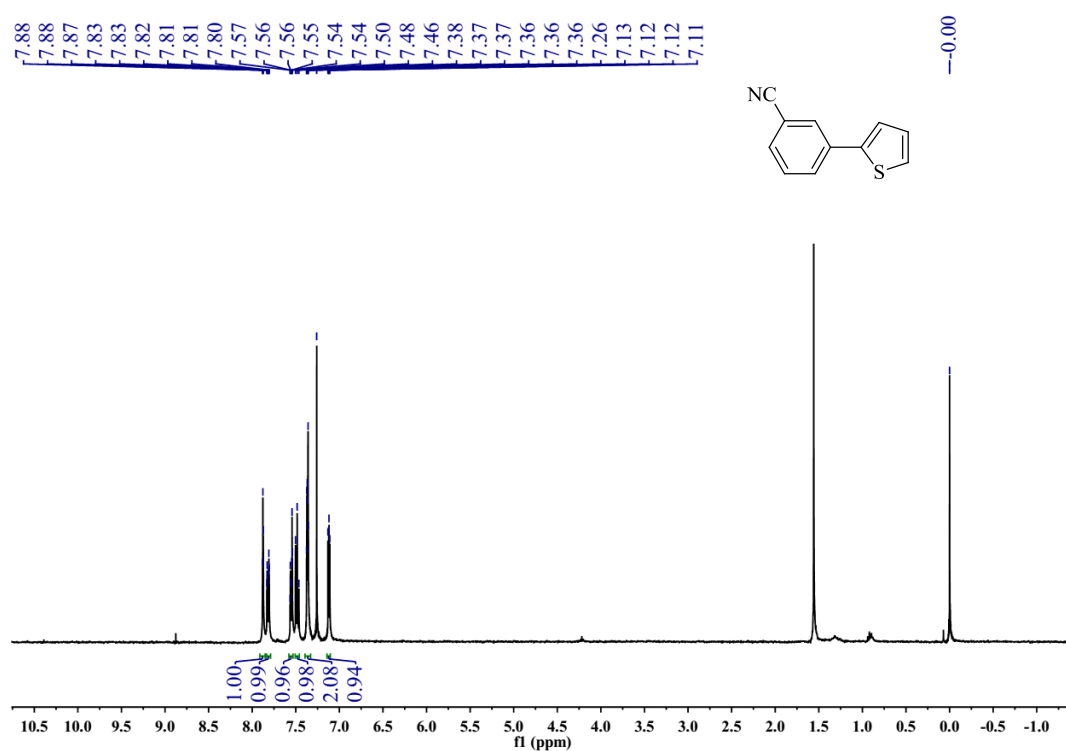

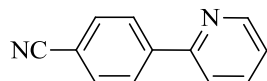

4-(pyridin-2-yl) benzonitrile

Yellow solid.  $^1\text{H}$  NMR (400 MHz,  $\text{CDCl}_3$ ):  $\delta$  8.74 (d,  $J = 3.6$  Hz, 1H), 8.12 (d,  $J = 8.5$  Hz, 2H), 7.84-7.69 (m, 4H), 7.32 (ddd,  $J = 7.2, 4.8, 1.3$  Hz, 1H) ppm. Data is consistent with that reported in the literature.<sup>24</sup>

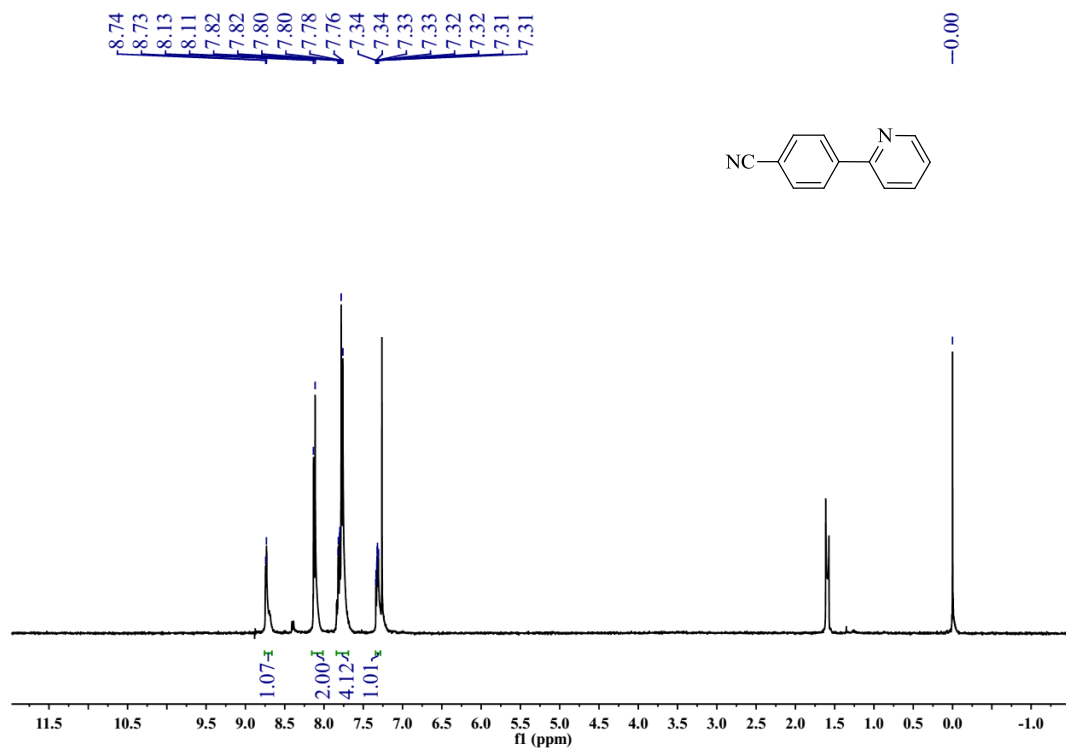

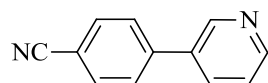

4-(pyridin-3-yl) benzonitrile

Yellow solid.  $^1\text{H}$  NMR (400 MHz,  $\text{CDCl}_3$ ):  $\delta$  8.86 (d,  $J = 2.2$  Hz, 1H), 8.68 (dd,  $J = 4.8, 1.5$  Hz, 1H), 7.93-7.84 (m, 1H), 7.79 (d,  $J = 8.3$  Hz, 2H), 7.70 (d,  $J = 8.4$  Hz, 2H), 7.43 (dd,  $J = 8.0, 4.8$  Hz, 1H) ppm. Data is consistent with that reported in the literature.<sup>24</sup>

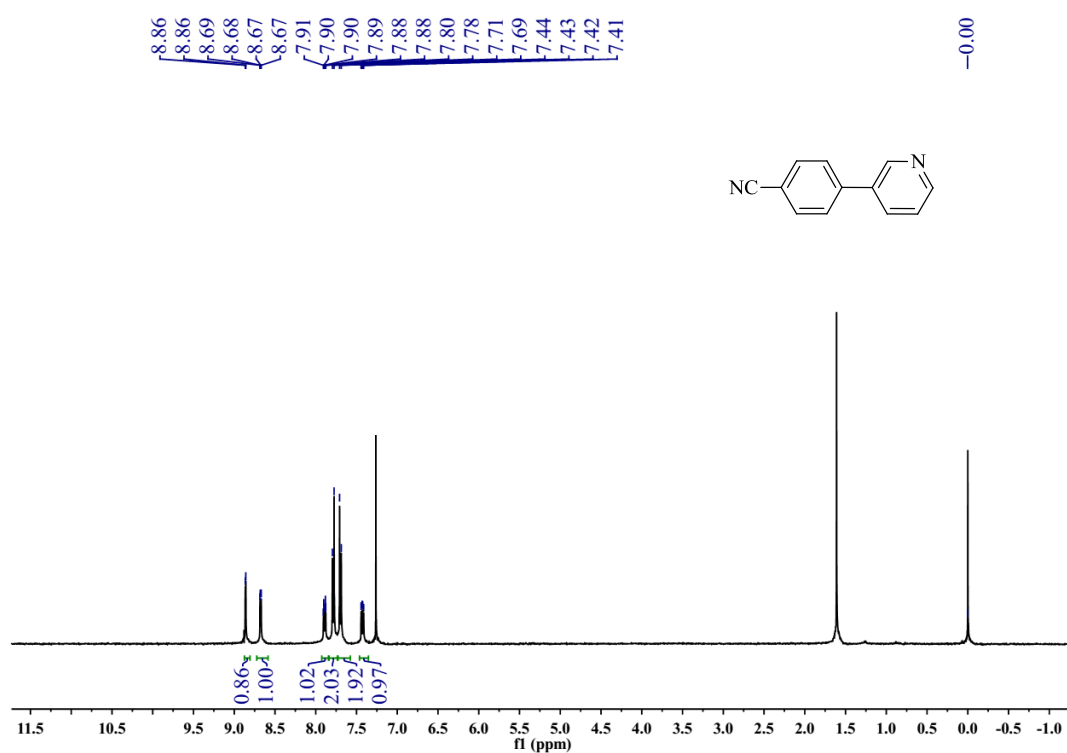

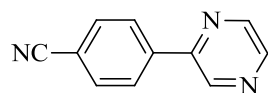

4-(pyrazin-2-yl) benzonitrile

Yellow solid.  $^1\text{H}$  NMR (400 MHz,  $\text{CDCl}_3$ ):  $\delta$  9.08 (s, 1H), 8.70 (dt,  $J = 2.4, 1.2$  Hz, 1H), 8.61 (d,  $J = 2.4$  Hz, 1H), 8.16 (d,  $J = 8.5$  Hz, 2H), 7.82 (d,  $J = 8.5$  Hz, 2H) ppm. Data is consistent with that reported in the literature.<sup>25</sup>

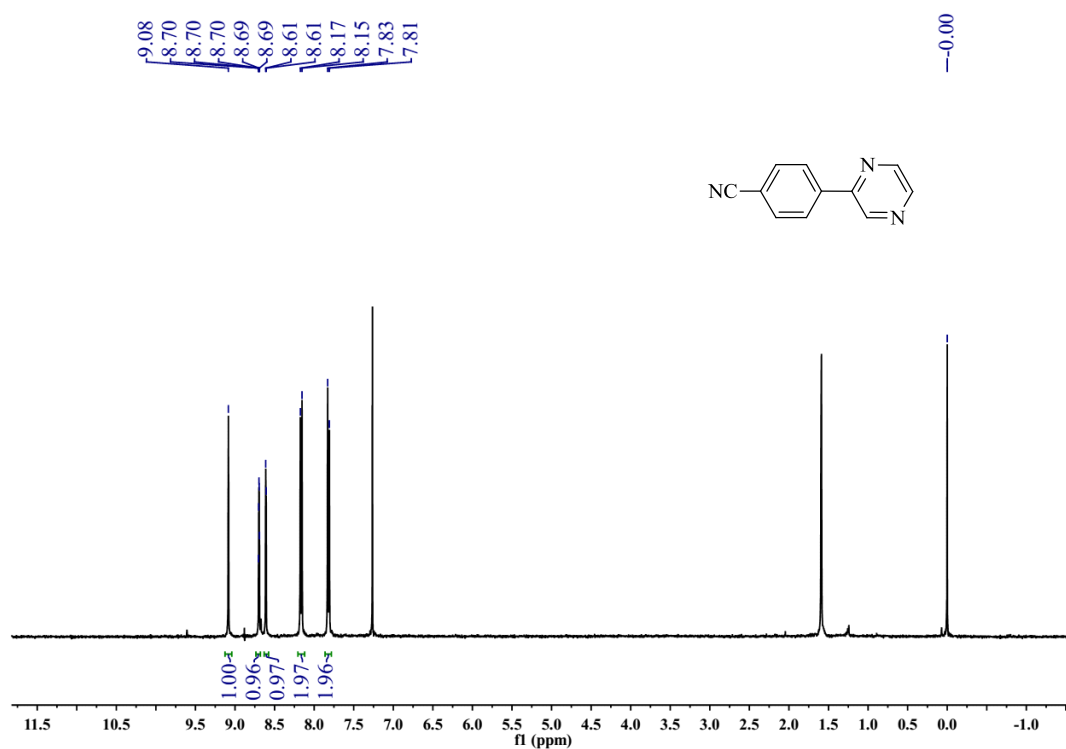

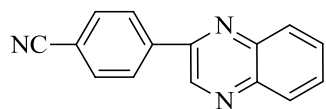

4-(quinoxalin-2-yl) benzonitrile

Yellow solid.  $^1\text{H}$  NMR (400 MHz,  $\text{CDCl}_3$ ):  $\delta$  9.36 (s, 1H), 8.35 (d,  $J = 7.9$  Hz, 2H), 8.17 (t,  $J = 6.1$  Hz, 2H), 7.94-7.74 (m, 4H) ppm. Data is consistent with that reported in the literature.<sup>26</sup>

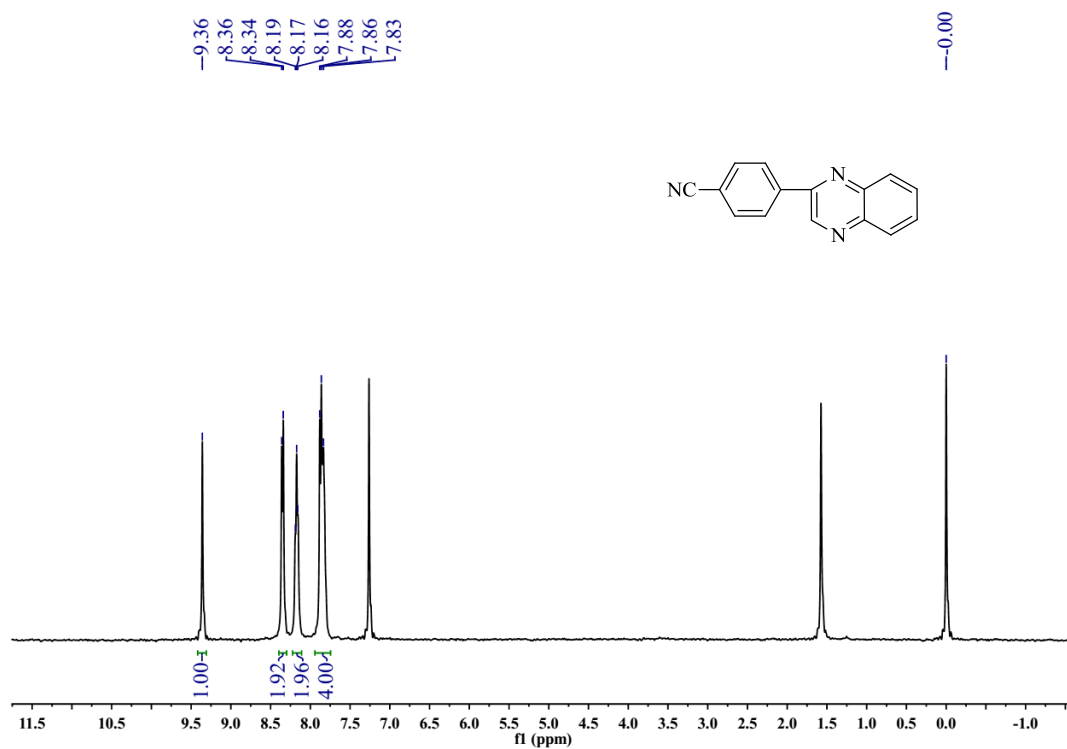

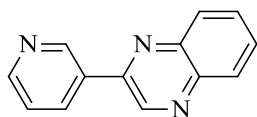

2-(pyridin-3-yl) quinoxaline

Yellow solid.  $^1\text{H}$  NMR (400 MHz,  $\text{CDCl}_3$ ):  $\delta$  9.43 (d,  $J = 2.2$  Hz, 1H), 9.36 (s, 1H), 8.78 (dd,  $J = 4.8, 1.6$  Hz, 1H), 8.57 – 8.50 (m, 1H), 8.21 – 8.14 (m, 2H), 7.87 – 7.79 (m, 2H), 7.53 (dd,  $J = 8.0, 4.9$  Hz, 1H) ppm. Data is consistent with that reported in the literature.<sup>27</sup>

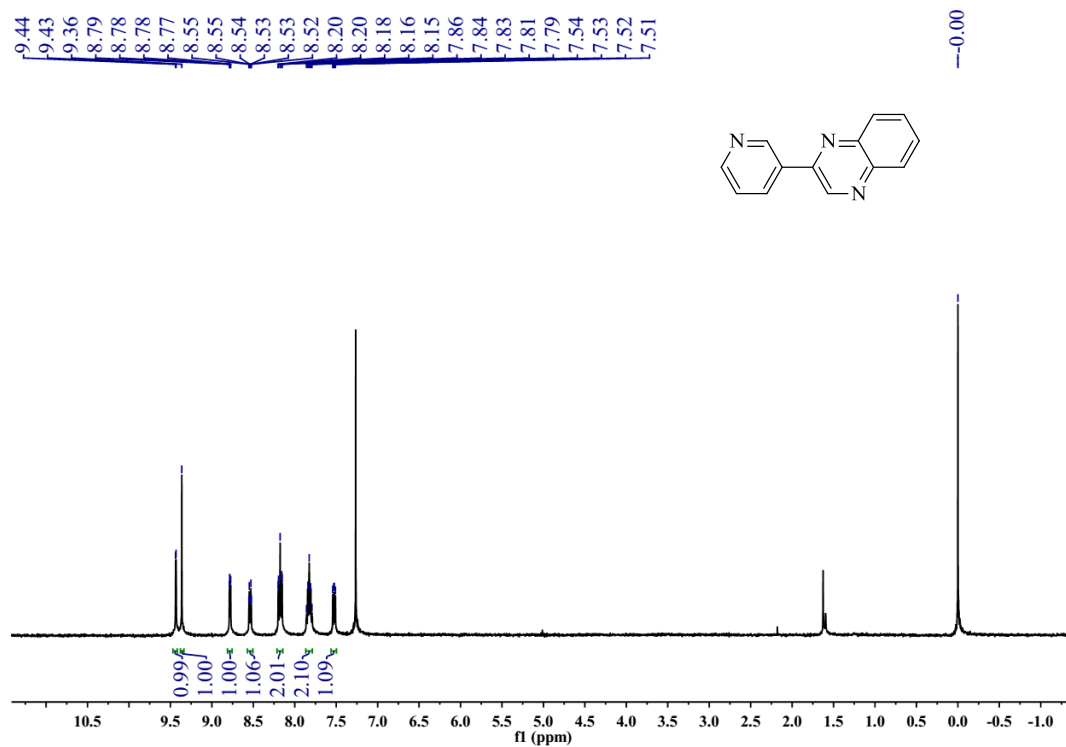

## References:

- 1 D.-W. Lee and J. Yun, *Bull. Korean Chem. Soc.*, 2004, **25**, 29-30.
- 2 N. Barbero and R. Martin, *Org. Lett.*, 2012, **14**, 796-799.
- 3 D. Toummini, F. Ouazzani and M. Taillefer, *Org. Lett.*, 2013, **15**, 4690-4693.
- 4 Y. Miyake, M. Wu, M. J. Rahman, Y. Kuwatani and M. Iyoda, *J. Org. Chem.*, 2006, **71**, 6110-6117.
- 5 B. Schmidt and M. Riemer, *J. Org. Chem.*, 2014, **79**, 4104-4118.
- 6 J. Graff, T. Debande, J. Praz, L. Guénée and A. Alexakis, *Org. Lett.*, 2013, **15**, 4270-4273.
- 7 R. N. Dhital, C. Kamonsatikul, E. Somsook, K. Bobuatong, M. Ehara, S. Karanjit and H. Sakurai, *J. Am. Chem. Soc.*, 2012, **134**, 20250-20253.
- 8 L. Wang, Y.-H. Zhang, L.-F. Liu and Y.-G. Wang, *J. Org. Chem.*, 2006, **71**, 1284-1287.
- 9 R. B. N. Baig and R. S. Varma, *Green Chem.*, 2013, **15**, 398-417.
- 10 C. F. Nising, U. K. Schmid, M. Nieger and S. Bräse, *J. Org. Chem.*, 2004, **69**, 6830-6833.
- 11 B. Inés, R. SanMartin, F. Churruca, E. Domínguez, M. K. Urtiaga and M. I. Arriortua, *Organometallics*, 2008, **27**, 2833-2839.
- 12 K. Billingsley and S. L. Buchwald, *J. Am. Chem. Soc.*, 2007, **129**, 3358-3366.
- 13 P. Leowanawat, N. Zhang, A.-M. Resmerita, B. M. Rosen and V. Percec, *J. Org. Chem.*, 2011, **76**, 9946-9955.
- 14 Z.-Y. Wang, G.-Q. Chen and L.-X. Shao, *J. Org. Chem.*, 2012, **77**, 6608-6614.
- 15 L. J. Goossen, C. Linder, N. Rodríguez and P. P. Lange, *Chem.–Eur. J.*, 2009, **15**, 9336-9349.
- 16 G.-L. Zhang, *Synthesis*, 2005, 537-542.
- 17 T. Ginman, J. Viklund, J. Malmström, J. Blid, R. Emond, R. Forsblom, A. Johansson, A. Kers, F. Lake, F. Sehgelmeble, K. J. Sterky, M. Bergh, A. Lindgren, P. Johansson, F. Jeppsson, J. Fäiting, Y. Gravenfors and F. Rahm, *J. Med. Chem.*, 2013, **56**, 4181-4205.
- 18 A.-L. Liu, X.-M. Zhang and W.-Z. Chen, *Organometallics*, 2009, **28**, 4868-4871.
- 19 I. R. Baxendale, C. M. Griffiths-Jones, S. V. Ley and G. K. Tranmer, *Chem.–Eur. J.*, 2006, **12**, 4407-4416.
- 20 S. Sase, M. Jaric, A. Metzger, V. Malakhov and P. Knochel, *J. Org. Chem.*, 2008, **73**, 7380-7382.
- 21 X. Chen, L.-M. Zhou, Y.-M. Li, T. Xie and S.-L. Zhou, *J. Org. Chem.*, 2014, **79**, 230-239.
- 22 G. A. Molander, S. L. J. Trice and S. M. Kennedy, *J. Org. Chem.*, 2012, **77**, 8678-8688.
- 23 M. R. Luzung, J. S. Patel and J.-J. Yin, *J. Org. Chem.*, 2010, **75**, 8330-8332.
- 24 S. Sévigny and P. Forgione, *Chem.–Eur. J.*, 2013, **19**, 2256-2260.
- 25 J.-M. Béguin and C. Gosmini, *J. Org. Chem.*, 2009, **74**, 3221-322.
- 26 F.-A. Kang, Z.-H. Sui and W. V. Murray, *J. Am. Chem. Soc.*, 2008, **130**, 11300-11302.

27 A. Fürstner, A. Leitner, M. Méndez and H. Krause, *J. Am. Chem. Soc.*, 2002, **124**, 13856-13863.
